# Supplementary material
Source: PubMed Central journal article supplement (PMC5342946)
Supplement: NIHMS838641-supplement-Supp_infoS2.pdf [file NIHMS838641-supplement-Supp_infoS2.pdf]

|                     |     |     |     |     |     |     |     |     |     |     |     |     |     |     |     |     |     |     |     |     |     |     |     |     |     |     |     |     |
|---------------------|-----|-----|-----|-----|-----|-----|-----|-----|-----|-----|-----|-----|-----|-----|-----|-----|-----|-----|-----|-----|-----|-----|-----|-----|-----|-----|-----|-----|
|                     | 135 | 136 | 137 | 138 | 139 | 140 | 141 | 142 | 143 | 144 | 145 | 146 | 147 | 148 | 149 | 150 | 151 | 152 | 153 | 154 | 155 | 156 | 157 | 158 | 159 | 160 | 161 | 162 |
|                     |     |     |     |     |     |     |     |     |     |     |     |     |     |     |     |     |     |     |     |     |     | Δ   |     | Δ   |     |     |     |     |
| <i>A. ocellatus</i> | 169 | 170 | 171 | 172 | 173 | 174 | 175 | 176 | 177 | 178 | 179 | 180 | 181 | 182 | 183 | 184 | 185 | 186 | 187 | 188 | 189 | 190 | 191 | 192 | 193 | 194 | 195 | 196 |
| <i>P. scalarae</i>  | C   | A   | L   | S   | A   | A   | V   | P   | P   | L   | V   | G   | W   | S   | R   | Y   | I   | P   | E   | G   | M   | Q   | C   | S   | C   | A   | P   | D   |
| <i>C. frenata</i>   | C   | A   | M   | S   | A   | A   | V   | P   | P   | L   | V   | G   | W   | S   | R   | Y   | I   | P   | E   | G   | M   | Q   | C   | S   | C   | G   | P   | D   |
| <i>O. niloticus</i> | C   | A   | L   | S   | A   | A   | V   | P   | P   | L   | V   | G   | W   | S   | R   | Y   | I   | P   | E   | G   | M   | Q   | C   | S   | C   | G   | P   | D   |
| BovRH               | M   | A   | L   | A   | C   | A   | A   | P   | P   | L   | V   | G   | W   | S   | R   | Y   | I   | P   | E   | G   | M   | Q   | C   | S   | C   | G   | I   | D   |
|                     | 163 | 164 | 165 | 166 | 167 | 168 | 169 | 170 | 171 | 172 | 173 | 174 | 175 | 176 | 177 | 178 | 179 | 180 | 181 | 182 | 183 | 184 | 185 | 186 | 187 | 188 | 189 | 190 |
|                     |     |     |     |     |     |     |     |     |     |     |     |     |     |     |     |     |     |     |     |     |     |     |     |     |     |     |     |     |
| <i>A. ocellatus</i> | 197 | 198 | 199 | 200 | 201 | 202 | 203 | 204 | 205 | 206 | 207 | 208 | 209 | 210 | 211 | 212 | 213 | 214 | 215 | 216 | 217 | 218 | 219 | 220 | 221 | 222 | 223 | 224 |
| <i>P. scalarae</i>  | W   | Y   | T   | T   | G   | N   | K   | F   | N   | N   | E   | T   | F   | V   | M   | Y   | L   | F   | C   | F   | C   | F   | A   | V   | P   | F   | C   | T   |
| <i>C. frenata</i>   | W   | Y   | T   | A   | G   | N   | K   | F   | N   | N   | E   | T   | Y   | V   | I   | Y   | L   | F   | C   | F   | C   | F   | A   | V   | P   | F   | C   | T   |
| <i>O. niloticus</i> | W   | Y   | T   | T   | G   | N   | K   | Y   | N   | N   | E   | T   | F   | V   | I   | Y   | L   | F   | C   | F   | C   | F   | A   | V   | P   | F   | C   | T   |
| BovRH               | Y   | Y   | T   | P   | H   | E   | E   | T   | N   | N   | E   | S   | F   | V   | I   | Y   | M   | F   | V   | V   | H   | F   | I   | I   | P   | L   | I   | V   |
|                     | 191 | 192 | 193 | 194 | 195 | 196 | 197 | 198 | 199 | 200 | 201 | 202 | 203 | 204 | 205 | 206 | 207 | 208 | 209 | 210 | 211 | 212 | 213 | 214 | 215 | 216 | 217 | 218 |
|                     |     |     |     |     |     |     |     |     |     |     |     |     | *   |     |     | *   |     |     |     |     |     |     |     |     |     |     | *   |     |
|                     |     |     |     |     |     |     |     |     |     |     |     |     |     |     |     |     |     |     |     |     |     |     |     |     |     |     |     |     |
| <i>A. ocellatus</i> | 225 | 226 | 227 | 228 | 229 | 230 | 231 | 232 | 233 | 234 | 235 | 236 | 237 | 238 | 239 | 240 | 241 | 242 | 243 | 244 | 245 | 246 | 247 | 248 | 249 | 250 | 251 | 252 |
| <i>P. scalarae</i>  | I   | I   | F   | C   | Y   | S   | Q   | L   | L   | L   | M   | L   | K   | S   | A   | V   | K   | A   | Q   | A   | E   | S   | A   | S   | T   | Q   | K   | A   |
| <i>C. frenata</i>   | I   | I   | F   | C   | Y   | S   | Q   | L   | L   | F   | T   | L   | K   | S   | A   | V   | K   | A   | Q   | S   | E   | S   | A   | S   | T   | Q   | K   | A   |
| <i>O. niloticus</i> | I   | I   | F   | C   | Y   | S   | Q   | L   | L   | F   | M   | L   | K   | S   | A   | V   | K   | A   | Q   | A   | E   | S   | A   | S   | T   | Q   | K   | A   |
| BovRH               | I   | F   | F   | C   | Y   | G   | Q   | L   | V   | F   | T   | V   | K   | E   | A   | A   | A   | Q   | Q   | Q   | E   | S   | A   | T   | T   | Q   | K   | A   |
|                     | 219 | 220 | 221 | 222 | 223 | 224 | 225 | 226 | 227 | 228 | 229 | 230 | 231 | 232 | 233 | 234 | 235 | 236 | 237 | 238 | 239 | 240 | 241 | 242 | 243 | 244 | 245 | 246 |
|                     |     |     |     |     |     |     |     |     |     |     |     |     |     |     |     |     |     |     |     |     |     |     |     |     |     |     |     |     |
| <i>A. ocellatus</i> | 253 | 254 | 255 | 256 | 257 | 258 | 259 | 260 | 261 | 262 | 263 | 264 | 265 | 266 | 267 | 268 | 269 | 270 | 271 | 272 | 273 | 274 | 275 | 276 | 277 | 278 | 279 | 280 |
| <i>P. scalarae</i>  | E   | K   | E   | V   | T   | K   | M   | V   | V   | I   | M   | V   | F   | G   | F   | L   | V   | C   | W   | M   | P   | Y   | T   | S   | F   | A   | L   | W   |
| <i>C. frenata</i>   | E   | K   | E   | V   | T   | K   | M   | V   | V   | I   | M   | V   | F   | G   | F   | L   | V   | C   | W   | M   | P   | Y   | T   | S   | F   | A   | L   | W   |
| <i>O. niloticus</i> | E   | K   | E   | V   | T   | R   | M   | V   | V   | I   | M   | V   | L   | G   | F   | L   | V   | C   | W   | M   | P   | Y   | A   | S   | F   | A   | V   | W   |
| BovRH               | E   | K   | E   | V   | T   | R   | M   | V   | I   | M   | V   | I   | A   | F   | F   | L   | I   | C   | W   | L   | P   | Y   | A   | G   | V   | A   | F   | Y   |
|                     | 247 | 248 | 249 | 250 | 251 | 252 | 253 | 254 | 255 | 256 | 257 | 258 | 259 | 260 | 261 | 262 | 263 | 264 | 265 | 266 | 267 | 268 | 269 | 270 | 271 | 272 | 273 | 274 |
|                     |     |     |     |     |     |     |     |     |     |     |     |     |     |     |     |     |     |     |     |     |     |     |     |     |     |     |     |     |
|                     |     |     |     |     |     |     |     |     |     |     |     |     |     |     |     |     |     |     |     |     |     |     |     |     |     |     |     |     |
|                     |     |     |     |     |     |     |     |     |     |     |     |     |     |     |     |     |     |     |     |     |     |     |     |     |     |     |     |     |
| <i>A. ocellatus</i> | 281 | 282 | 283 | 284 | 285 | 286 | 287 | 288 | 289 | 290 | 291 | 292 | 293 | 294 | 295 | 296 | 297 | 298 | 299 | 300 | 301 | 302 | 303 | 304 | 305 | 306 | 307 | 308 |
| <i>P. scalarae</i>  | I   | I   | N   | N   | R   | G   | Q   | P   | F   | D   | L   | R   | L   | A   | T   | I   | P   | S   | C   | F   | S   | K   | A   | S   | T   | V   | Y   | N   |
| <i>C. frenata</i>   | I   | I   | N   | N   | R   | G   | Q   | P   | F   | D   | L   | R   | L   | A   | T   | I   | P   | S   | C   | F   | S   | K   | A   | S   | T   | V   | Y   | N   |
| <i>O. niloticus</i> | I   | T   | N   | N   | R   | G   | Q   | P   | F   | D   | L   | R   | L   | A   | T   | I   | P   | S   | C   | F   | S   | K   | A   | S   | T   | V   | Y   | N   |
| BovRH               | V   | V   | N   | N   | R   | G   | Q   | P   | F   | D   | L   | R   | L   | A   | T   | I   | P   | S   | C   | F   | S   | K   | A   | S   | T   | V   | Y   | N   |
|                     | 275 | 276 | 277 | 278 | 279 | 280 | 281 | 282 | 283 | 284 | 285 | 286 | 287 | 288 | 289 | 290 | 291 | 292 | 293 | 294 | 295 | 296 | 297 | 298 | 299 | 300 | 301 | 302 |
|                     |     |     |     |     |     |     |     |     |     |     |     |     |     |     |     |     |     |     |     |     |     |     |     |     |     |     |     |     |
|                     |     |     |     |     |     |     |     |     |     |     |     |     |     |     |     |     |     |     |     |     |     |     |     |     |     |     |     |     |
|                     |     |     |     |     |     |     |     |     |     |     |     |     |     |     |     |     |     |     |     |     |     |     |     |     |     |     |     |     |
| <i>A. ocellatus</i> | 309 | 310 | 311 | 312 | 313 | 314 | 315 | 316 | 317 | 318 | 319 | 320 | 321 | 322 | 323 | 324 | 325 | 326 | 327 | 328 | 329 | 330 | 331 |     | 332 | 333 | 334 |     |
| <i>P. scalarae</i>  | P   | V   | I   | Y   | I   | L   | L   | N   | K   | Q   | F   | R   | S   | C   | L   | R   | K   | M   | L   | G   | M   | S   | G   |     | G   | D   | E   |     |
| <i>C. frenata</i>   | P   | V   | I   | Y   | I   | L   | L   | N   | K   | Q   | F   | R   | S   | C   | L   | R   | K   | M   | L   | G   | M   | S   | G   |     | G   | D   | E   |     |
| <i>O. niloticus</i> | P   | V   | I   | Y   | I   | L   | L   | N   | K   | Q   | F   | H   | S   | C   | L   | R   | K   | M   | L   | G   | M   | S   | G   |     | G   | D   | E   |     |
| BovRH               | P   | V   | I   | Y   | I   | L   | L   | N   | K   | Q   | F   | R   | S   | C   | I   | R   | K   | M   | L   | G   | M   | S   | G   |     | G   | D   | D   |     |
|                     | 303 | 304 | 305 | 306 | 307 | 308 | 309 | 310 | 311 | 312 | 313 | 314 | 315 | 316 | 317 | 318 | 319 | 320 | 321 | 322 | 323 | 324 | 325 | 326 | 327 | 328 | 329 | 330 |
|                     |     |     |     |     |     |     |     |     |     |     |     |     |     |     |     |     |     |     |     |     |     |     |     |     |     |     |     |     |
|                     |     |     |     |     |     |     |     |     |     |     |     |     |     |     |     |     |     |     |     |     |     |     |     |     |     |     |     |     |
|                     |     |     |     |     |     |     |     |     |     |     |     |     |     |     |     |     |     |     |     |     |     |     |     |     |     |     |     |     |
| <i>A. ocellatus</i> | 335 | 336 | 337 | 338 | 339 | 340 | 341 | 342 | 343 | 344 | 345 | 346 | 347 | 348 | 349 | 350 | 351 | 352 |     |     |     |     |     |     |     |     |     |     |
| <i>P. scalarae</i>  | E   | E   | S   | P   | T   | S   | Q   | S   | A   | T   | E   | V   | S   | K   | V   | G   | P   | A   |     |     |     |     |     |     |     |     |     |     |
| <i>C. frenata</i>   | D   | E   | S   | T   | T   | N   | Q   | S   | A   | T   | E   | V   | S   | K   | V   | G   | P   | A   |     |     |     |     |     |     |     |     |     |     |
| <i>O. niloticus</i> | E   | A   | S   | S   | I   | S   | Q   | S   | A   | T   | E   | V   | S   | K   | V   | G   | P   | A   |     |     |     |     |     |     |     |     |     |     |
| BovRH               | E   | E   | S   | S   | S   | Q   | S   | T   | T   | E   | V   | S   | K   | V   | G   | P   | A   |     |     |     |     |     |     |     |     |     |     |     |
|                     | S   | T   | T   | V   | S   | K   | T   | E   | T   | S   | Q   | V   | A   | P   | A   |     |     |     |     |     |     |     |     |     |     |     |     |     |
|                     | 331 | 332 | 333 | 334 | 335 | 336 | 337 | 338 | 339 | 340 | 341 | 342 | 343 | 344 | 345 |     |     |     |     |     |     |     |     |     |     |     |     |     |
|                     |     |     |     |     |     |     |     |     |     |     |     |     |     |     |     |     |     |     |     |     |     |     |     |     |     |     |     |     |
|                     |     |     |     |     |     |     |     |     |     |     |     |     |     |     |     |     |     |     |     |     |     |     |     |     |     |     |     |     |
|                     |     |     |     |     |     |     |     |     |     |     |     |     |     |     |     |     |     |     |     |     |     |     |     |     |     |     |     |     |
| <b>SWS2A</b>        | 1   | 2   | 3   | 4   | 5   | 6   | 7   | 8   | 9   | 10  | 11  | 12  | 13  | 14  | 15  | 16  | 17  | 18  | 19  | 20  | 21  | 22  | 23  | 24  | 25  | 26  | 27  | 28  |
| <i>S. discus</i>    | M   | R   | G   | N   | R   | D   | M   | E   | L   | P   | E   | D   | F   | W   | I   | P   | V   | K   | L   | D   | T   | N   | N   | I   | T   | S   | L   | S   |
| <i>P. scalare</i>   | M   | R   | G   | N   | R   | D   | L   | E   | L   | P   | E   | D   | F   | W   | I   | P   | I   | K   | L   | D   | T   | N   | N   | I   | T   | S   | L   | S   |
| <i>A. ocellatus</i> | M   | R   | G   | N   | R   | D   | M   | E   | L   | P   | E   | D   | F   | Y   | I   | P   | I   | K   | L   | D   | T   | N   | N   | I   | T   | S   | L   | S   |
| <i>C. frenata</i>   | M   | R   | G   | N   | R   | D   | M   | E   | L   | P   | E   | D   | F   | W   | I   | P   | V   | S   | L   | D   | T   | N   | N   | I   | T   | S   | L   | S   |
| <i>O. niloticus</i> | M   | R   | G   | N   | R   | D   | M   | E   | L   | P   | E   | D   | F   | W   | I   | P   | V   | S   | L   | D   | T   | N   | N   | I   | T   | S   | L   | S   |
| BovRH               | M   | N   | G   | T   |     |     |     |     | E   | G   | P   | N   | F   | Y   | V   | P   | F   | S   | N   |     |     | K   | T   | G   | V   | V   | R   | S   |
|                     | 1   | 2   | 3   | 4   |     |     |     |     | 5   | 6   | 7   | 8   | 9   | 10  | 11  | 12  | 13  | 14  | 15  |     |     | 16  | 17  | 18  | 19  | 20  | 21  | 22  |

|                     |    |    |    |    |    |    |    |    |    |    |    |    |    |    |    |    |    |    |    |    |    |    |    |    |    |    |    |    |
|---------------------|----|----|----|----|----|----|----|----|----|----|----|----|----|----|----|----|----|----|----|----|----|----|----|----|----|----|----|----|
|                     | 29 | 30 | 31 | 32 | 33 | 34 | 35 | 36 | 37 | 38 | 39 | 40 | 41 | 42 | 43 | 44 | 45 | 46 | 47 | 48 | 49 | 50 | 51 | 52 | 53 | 54 | 55 | 56 |
| <i>S. discus</i>    | P  | F  | L  | V  | P  | Q  | D  | H  | L  | G  | D  | S  | L  | T  | F  | Y  | A  | M  | A  | A  | F  | M  | L  | F  | I  | F  | I  | F  |
| <i>P. scalare</i>   | P  | F  | L  | V  | P  | Q  | D  | H  | L  | G  | D  | S  | L  | T  | F  | Y  | A  | M  | A  | V  | F  | M  | L  | F  | I  | F  | V  | F  |
| <i>A. ocellatus</i> | P  | F  | L  | V  | P  | Q  | D  | H  | L  | G  | D  | A  | L  | T  | F  | Y  | A  | M  | A  | V  | F  | T  | F  | I  | F  | I  | F  |    |
| <i>C. frenata</i>   |    |    |    |    |    | Q  | D  | H  | L  | G  | D  | S  | L  | T  | F  | Y  | S  | M  | A  | A  | F  | M  | L  | F  | I  | F  | I  | F  |
| <i>O. niloticus</i> | P  | F  | L  | V  | P  | Q  | D  | H  | L  | G  | D  | T  | A  | T  | F  | Y  | A  | M  | A  | V  | F  | M  | L  | F  | I  | F  | I  | F  |
| BovRH               | P  | F  | E  | A  | P  | Q  | D  | Y  | L  | A  | E  | P  | W  | Q  | F  | S  | M  | L  | A  | A  | Y  | M  | F  | L  | L  | I  | M  | L  |

23 24 25 26 27 28 29 30 31 32 33 34 35 36 37 38 39 40 41 42 43 44 45 46 47 48 49 50  
 \* \*\*  
 Δ Δ Δ Δ Δ

|                     |    |    |    |    |    |    |    |    |    |    |    |    |    |    |    |    |    |    |    |    |    |    |    |    |    |    |    |    |
|---------------------|----|----|----|----|----|----|----|----|----|----|----|----|----|----|----|----|----|----|----|----|----|----|----|----|----|----|----|----|
|                     | 57 | 58 | 59 | 60 | 61 | 62 | 63 | 64 | 65 | 66 | 67 | 68 | 69 | 70 | 71 | 72 | 73 | 74 | 75 | 76 | 77 | 78 | 79 | 80 | 81 | 82 | 83 | 84 |
| <i>S. discus</i>    | G  | T  | F  | I  | N  | V  | L  | T  | V  | A  | C  | T  | V  | Q  | Y  | K  | K  | L  | R  | S  | H  | L  | N  | Y  | I  | L  | L  | N  |
| <i>P. scalare</i>   | G  | T  | F  | I  | N  | V  | L  | T  | I  | A  | C  | T  | V  | Q  | Y  | K  | K  | L  | R  | S  | H  | L  | N  | Y  | I  | L  | L  | N  |
| <i>A. ocellatus</i> | G  | T  | F  | I  | N  | V  | L  | T  | I  | A  | C  | T  | V  | Q  | Y  | K  | K  | L  | R  | S  | H  | L  | N  | Y  | I  | L  | L  | N  |
| <i>C. frenata</i>   | G  | T  | F  | I  | N  | V  | L  | T  | I  | A  | C  | T  | I  | Q  | Y  | K  | K  | L  | R  | S  | H  | L  | N  | Y  | I  | L  | L  | N  |
| <i>O. niloticus</i> | G  | T  | F  | I  | N  | A  | L  | T  | I  | A  | C  | T  | I  | Q  | Y  | K  | K  | L  | R  | S  | H  | L  | N  | Y  | I  | L  | L  | N  |
| BovRH               | G  | F  | P  | I  | N  | F  | L  | T  | L  | Y  | V  | T  | V  | Q  | H  | K  | K  | L  | R  | T  | P  | L  | N  | Y  | I  | L  | L  | N  |

51 52 53 54 55 56 57 58 59 60 61 62 63 64 65 66 67 68 69 70 71 72 73 74 75 76 77 78  
 Δ Δ

|                     |    |    |    |    |    |    |    |    |    |    |    |    |    |    |    |     |     |     |     |     |     |     |     |     |     |     |     |     |
|---------------------|----|----|----|----|----|----|----|----|----|----|----|----|----|----|----|-----|-----|-----|-----|-----|-----|-----|-----|-----|-----|-----|-----|-----|
|                     | 85 | 86 | 87 | 88 | 89 | 90 | 91 | 92 | 93 | 94 | 95 | 96 | 97 | 98 | 99 | 100 | 101 | 102 | 103 | 104 | 105 | 106 | 107 | 108 | 109 | 110 | 111 | 112 |
| <i>S. discus</i>    | L  | A  | A  | N  | L  | I  | V  | S  | C  | V  | G  | S  | F  | T  | A  | C   | C   | S   | F   | A   | F   | R   | Y   | F   | I   | F   | G   |     |
| <i>P. scalare</i>   | L  | S  | A  | A  | N  | L  | I  | V  | S  | C  | V  | G  | S  | F  | T  | A   | C   | C   | S   | F   | S   | F   | R   | Y   | F   | I   | F   | G   |
| <i>A. ocellatus</i> | L  | A  | A  | N  | L  | I  | V  | S  | I  | V  | G  | S  | F  | T  | A  | C   | C   | S   | F   | S   | F   | R   | Y   | F   | V   | F   | G   |     |
| <i>C. frenata</i>   | L  | A  | A  | N  | L  | I  | V  | S  | V  | V  | G  | S  | F  | T  | A  | C   | C   | S   | F   | A   | F   | R   | Y   | F   | I   | F   | G   |     |
| <i>O. niloticus</i> | L  | S  | A  | A  | N  | L  | I  | V  | S  | C  | V  | G  | S  | F  | T  | A   | C   | C   | S   | F   | S   | F   | R   | Y   | F   | I   | F   | G   |
| BovRH               | L  | A  | V  | A  | D  | L  | F  | M  | V  | F  | G  | G  | F  | T  | T  | L   | Y   | T   | S   | L   | H   | G   | Y   | F   | V   | F   | G   |     |

79 80 81 82 83 84 85 86 87 88 89 90 91 92 93 94 95 96 97 98 99 100 101 102 103 104 105 106  
 \* Δ Δ Δ Δ

|                     |     |     |     |     |     |     |     |     |     |     |     |     |     |     |     |     |     |     |     |     |     |     |     |     |     |     |     |     |
|---------------------|-----|-----|-----|-----|-----|-----|-----|-----|-----|-----|-----|-----|-----|-----|-----|-----|-----|-----|-----|-----|-----|-----|-----|-----|-----|-----|-----|-----|
|                     | 113 | 114 | 115 | 116 | 117 | 118 | 119 | 120 | 121 | 122 | 123 | 124 | 125 | 126 | 127 | 128 | 129 | 130 | 131 | 132 | 133 | 134 | 135 | 136 | 137 | 138 | 139 | 140 |
| <i>S. discus</i>    | A   | L   | A   | C   | K   | I   | E   | G   | F   | L   | V   | T   | L   | G   | G   | M   | V   | S   | L   | W   | S   | L   | A   | V   | I   | A   | F   | E   |
| <i>P. scalare</i>   | A   | L   | A   | C   | K   | I   | E   | G   | F   | L   | V   | T   | L   | G   | G   | M   | V   | S   | L   | W   | S   | L   | A   | V   | I   | A   | F   | E   |
| <i>A. ocellatus</i> | P   | L   | A   | C   | K   | I   | E   | G   | F   | L   | V   | T   | L   | G   | G   | M   | V   | S   | L   | W   | S   | L   | T   | V   | I   | A   | F   | E   |
| <i>C. frenata</i>   | A   | L   | A   | C   | K   | I   | E   | G   | F   | L   | V   | T   | L   | G   | G   | M   | V   | S   | L   | W   | S   | L   | A   | V   | V   | A   | F   | E   |
| <i>O. niloticus</i> | A   | L   | A   | C   | K   | I   | E   | G   | F   | M   | V   | T   | L   | G   | G   | M   | V   | S   | L   | W   | S   | L   | A   | V   | I   | A   | F   | E   |
| BovRH               | P   | T   | G   | C   | N   | L   | E   | G   | F   | F   | A   | T   | L   | G   | G   | E   | I   | A   | L   | W   | S   | L   | V   | V   | L   | A   | I   | E   |

107 108 109 110 111 112 113 114 115 116 117 118 119 120 121 122 123 124 125 126 127 128 129 130 131 132 133 134  
 \* Δ Δ Δ Δ

|                     |     |     |     |     |     |     |     |     |     |     |     |     |     |     |     |     |     |     |     |     |     |     |     |     |     |     |     |     |
|---------------------|-----|-----|-----|-----|-----|-----|-----|-----|-----|-----|-----|-----|-----|-----|-----|-----|-----|-----|-----|-----|-----|-----|-----|-----|-----|-----|-----|-----|
|                     | 141 | 142 | 143 | 144 | 145 | 146 | 147 | 148 | 149 | 150 | 151 | 152 | 153 | 154 | 155 | 156 | 157 | 158 | 159 | 160 | 161 | 162 | 163 | 164 | 165 | 166 | 167 | 168 |
| <i>S. discus</i>    | R   | W   | L   | V   | I   | C   | K   | P   | L   | G   | N   | F   | A   | F   | K   | P   | D   | H   | A   | L   | A   | C   | C   | A   | F   | T   | W   | F   |
| <i>P. scalare</i>   | R   | W   | L   | V   | I   | C   | K   | P   | L   | G   | N   | F   | A   | F   | K   | P   | D   | H   | A   | L   | A   | C   | C   | A   | F   | T   | W   | F   |
| <i>A. ocellatus</i> | R   | W   | L   | V   | I   | C   | K   | P   | L   | G   | S   | F   | A   | F   | K   | P   | N   | H   | A   | L   | A   | C   | C   | A   | F   | T   | W   | V   |
| <i>C. frenata</i>   | R   | W   | L   | V   | I   | C   | K   | P   | L   | G   | N   | F   | A   | F   | K   | P   | D   | H   | A   | L   | V   | C   | C   | A   | F   | T   | W   | F   |
| <i>O. niloticus</i> | R   | W   | L   | V   | I   | C   | K   | P   | L   | G   | N   | F   | A   | F   | K   | P   | D   | H   | A   | I   | A   | C   | C   | A   | F   | T   | W   | F   |
| BovRH               | R   | Y   | V   | V   | V   | C   | K   | P   | M   | S   | N   | F   | R   | F   | G   | E   | N   | H   | A   | I   | M   | G   | V   | A   | F   | T   | W   | V   |

135 136 137 138 139 140 141 142 143 144 145 146 147 148 149 150 151 152 153 154 155 156 157 158 159 160 161 162  
 Δ Δ Δ Δ

|                     |     |     |     |     |     |     |     |     |     |     |     |     |     |     |     |     |     |     |     |     |     |     |     |     |     |     |     |     |
|---------------------|-----|-----|-----|-----|-----|-----|-----|-----|-----|-----|-----|-----|-----|-----|-----|-----|-----|-----|-----|-----|-----|-----|-----|-----|-----|-----|-----|-----|
|                     | 169 | 170 | 171 | 172 | 173 | 174 | 175 | 176 | 177 | 178 | 179 | 180 | 181 | 182 | 183 | 184 | 185 | 186 | 187 | 188 | 189 | 190 | 191 | 192 | 193 | 194 | 195 | 196 |
| <i>S. discus</i>    | F   | A   | L   | A   | S   | A   | P   | P   | L   | F   | G   | W   | S   | R   | Y   | I   | P   | E   | G   | L   | Q   | C   | S   | C   | G   | P   | D   |     |
| <i>P. scalare</i>   | F   | A   | L   | A   | S   | A   | P   | P   | L   | F   | G   | W   | S   | R   | Y   | I   | P   | E   | G   | L   | Q   | C   | S   | C   | G   | P   | D   |     |
| <i>A. ocellatus</i> | F   | S   | L   | I   | A   | S   | A   | P   | P   | L   | F   | G   | W   | S   | R   | Y   | I   | P   | E   | G   | L   | Q   | C   | S   | C   | G   | P   | D   |
| <i>C. frenata</i>   | F   | A   | F   | I   | A   | S   | A   | P   | P   | L   | F   | G   | W   | S   | R   | Y   | I   | P   | E   | G   | L   | Q   | C   | S   | C   | G   | P   | D   |
| <i>O. niloticus</i> | F   | A   | L   | F   | A   | S   | A   | P   | P   | L   | F   | G   | W   | S   | R   | Y   | I   | P   | E   | G   | L   | Q   | C   | S   | C   | G   | P   | D   |
| BovRH               | M   | A   | L   | A   | C   | A   | A   | P   | P   | L   | V   | G   | W   | S   | R   | Y   | I   | P   | E   | G   | M   | Q   | C   | S   | C   | G   | I   | D   |

163 164 165 166 167 168 169 170 171 172 173 174 175 176 177 178 179 180 181 182 183 184 185 186 187 188 189 190  
 \* Δ Δ Δ

|                     |     |     |     |     |     |     |     |     |     |     |     |     |     |     |     |     |     |     |     |     |     |     |     |     |     |     |     |     |
|---------------------|-----|-----|-----|-----|-----|-----|-----|-----|-----|-----|-----|-----|-----|-----|-----|-----|-----|-----|-----|-----|-----|-----|-----|-----|-----|-----|-----|-----|
|                     | 197 | 198 | 199 | 200 | 201 | 202 | 203 | 204 | 205 | 206 | 207 | 208 | 209 | 210 | 211 | 212 | 213 | 214 | 215 | 216 | 217 | 218 | 219 | 220 | 221 | 222 | 223 | 224 |
| <i>S. discus</i>    | W   | Y   | T   | T   | N   | N   | K   | Y   | N   | N   | E   | S   | Y   | V   | I   | F   | L   | F   | C   | F   | C   | F   | A   | V   | P   | L   | T   | T   |
| <i>P. scalare</i>   | W   | Y   | T   | S   | N   | N   | K   | Y   | N   | N   | E   | S   | Y   | V   | M   | F   | L   | F   | C   | F   | C   | F   | A   | V   | P   | L   | F   | T   |
| <i>A. ocellatus</i> | W   | Y   | T   | S   | N   | N   | K   | Y   | N   | N   | E   | S   | Y   | V   | I   | F   | L   | F   | S   | F   | C   | F   | A   | F   | P   | L   | M   | I   |
| <i>C. frenata</i>   | W   | Y   | T   | T   | N   | N   | K   | Y   | N   | N   | E   | S   | Y   | V   | I   | F   | L   | F   | C   | F   | C   | F   | A   | V   | P   | F   | T   | T   |
| <i>O. niloticus</i> | W   | Y   | T   | T   | N   | N   | K   | Y   | N   | N   | E   | S   | Y   | V   | M   | F   | L   | F   | C   | F   | C   | F   | A   | V   | P   | L   | T   | T   |
| BovRH               | Y   | Y   | T   | P   | H   | E   | E   | T   | N   | N   | E   | S   | F   | V   | I   | Y   | M   | F   | V   | V   | H   | F   | I   | I   | P   | L   | I   | V   |

191 192 193 194 195 196 197 198 199 200 201 202 203 204 205 206 207 208 209 210 211 212 213 214 215 216 217 218  
 \* Δ Δ Δ Δ

|                     |     |     |     |     |     |     |     |     |     |     |     |     |     |     |     |     |     |     |     |     |     |     |     |     |     |     |     |     |
|---------------------|-----|-----|-----|-----|-----|-----|-----|-----|-----|-----|-----|-----|-----|-----|-----|-----|-----|-----|-----|-----|-----|-----|-----|-----|-----|-----|-----|-----|
|                     | 225 | 226 | 227 | 228 | 229 | 230 | 231 | 232 | 233 | 234 | 235 | 236 | 237 | 238 | 239 | 240 | 241 | 242 | 243 | 244 | 245 | 246 | 247 | 248 | 249 | 250 | 251 | 252 |
| <i>S. discus</i>    | I   | I   | F   | C   | Y   | S   | Q   | L   | L   | I   | T   | L   | K   | M   | A   | A   | K   | A   | Q   | A   | E   | S   | A   | S   | T   | Q   | K   | A   |
| <i>P. scalare</i>   | I   | I   | F   | C   | Y   | S   | Q   | L   | L   | I   | T   | L   | K   | M   | A   | A   | K   | A   | Q   | A   | E   | S   | A   | S   | T   | Q   | K   | A   |
| <i>A. ocellatus</i> | I   | I   | F   | C   | Y   | A   | Q   | L   | L   | I   | T   | L   | K   | M   | A   | A   | K   | A   | Q   | A   | E   | S   | A   | S   | T   | Q   | K   | A   |
| <i>C. frenata</i>   | I   | I   | F   | C   | Y   | S   | Q   | L   | L   | I   | T   | L   | K   | M   | A   | A   | K   | A   | Q   | A   | E   | S   | A   | S   | T   | Q   | K   | A   |
| <i>O. niloticus</i> | I   | I   | F   | C   | Y   | S   | Q   | L   | L   | I   | T   | L   | K   | M   | A   | A   | K   | A   | Q   | A   | E   | S   | A   | S   | T   | Q   | K   | A   |
| BovRH               | I   | F   | F   | C   | Y   | G   | Q   | L   | V   | F   | T   | V   | K   | E   | A   | A   | A   | Q   | Q   | Q   | E   | S   | A   | T   | T   | Q   | K   | A   |

219 220 221 222 223 224 225 226 227 228 229 230 231 232 233 234 235 236 237 238 239 240 241 242 243 244 245 246  
 \* Δ Δ Δ Δ

|                     |     |     |     |     |     |     |     |     |     |     |     |     |     |     |     |     |     |     |     |     |     |     |     |     |     |     |     |     |
|---------------------|-----|-----|-----|-----|-----|-----|-----|-----|-----|-----|-----|-----|-----|-----|-----|-----|-----|-----|-----|-----|-----|-----|-----|-----|-----|-----|-----|-----|
|                     | 253 | 254 | 255 | 256 | 257 | 258 | 259 | 260 | 261 | 262 | 263 | 264 | 265 | 266 | 267 | 268 | 269 | 270 | 271 | 272 | 273 | 274 | 275 | 276 | 277 | 278 | 279 | 280 |
| <i>S. discus</i>    | E   | K   | E   | V   | T   | R   | M   | V   | V   | I   | M   | V   | V   | G   | F   | L   | V   | C   | W   | L   | P   | Y   | A   | S   | F   | A   | L   | W   |
| <i>P. scalare</i>   | E   | R   | E   | V   | T   | R   | M   | V   | V   | I   | M   | V   | V   | G   | F   | L   | V   | C   | W   | L   | P   | Y   | A   | S   | F   | A   | L   | W   |
| <i>A. ocellatus</i> | E   | R   | E   | V   | T   | R   | M   | V   | V   | I   | M   | V   | V   | G   | F   | L   | V   | C   | W   | L   | P   | Y   | A   | S   | F   | A   | L   | W   |
| <i>C. frenata</i>   | E   | K   | E   | V   | T   | R   | M   | V   | V   | I   | M   | V   | V   | G   | F   | L   | V   | C   | W   | L   | P   | Y   | A   | S   | F   | A   | L   | W   |
| <i>O. niloticus</i> | E   | K   | E   | V   | T   | R   | M   | V   | V   | I   | M   | V   | L   | G   | F   | L   | V   | C   | W   | L   | P   | Y   | A   | S   | F   | A   | L   | W   |
| BovRH               | E   | K   | E   | V   | T   | R   | M   | V   | V   | I   | M   | V   | L   | G   | F   | L   | V   | C   | W   | L   | P   | Y   | A   | S   | F   | A   | L   | W   |
|                     | 247 | 248 | 249 | 250 | 251 | 252 | 253 | 254 | 255 | 256 | 257 | 258 | 259 | 260 | 261 | 262 | 263 | 264 | 265 | 266 | 267 | 268 | 269 | 270 | 271 | 272 | 273 | 274 |

|                     |     |     |     |     |     |     |     |     |     |     |     |     |     |     |     |     |     |     |     |     |     |     |     |     |     |     |     |     |
|---------------------|-----|-----|-----|-----|-----|-----|-----|-----|-----|-----|-----|-----|-----|-----|-----|-----|-----|-----|-----|-----|-----|-----|-----|-----|-----|-----|-----|-----|
|                     | 281 | 282 | 283 | 284 | 285 | 286 | 287 | 288 | 289 | 290 | 291 | 292 | 293 | 294 | 295 | 296 | 297 | 298 | 299 | 300 | 301 | 302 | 303 | 304 | 305 | 306 | 307 | 308 |
| <i>S. discus</i>    | V   | V   | N   | N   | R   | G   | Q   | P   | F   | D   | L   | R   | M   | A   | T   | I   | P   | S   | C   | F   | S   | K   | A   | S   | A   | V   | Y   | N   |
| <i>P. scalare</i>   | V   | V   | N   | N   | R   | G   | Q   | P   | F   | D   | L   | R   | M   | A   | T   | I   | P   | S   | C   | F   | S   | K   | A   | S   | A   | V   | Y   | N   |
| <i>A. ocellatus</i> | V   | V   | N   | N   | R   | G   | Q   | P   | F   | D   | L   | R   | M   | A   | T   | I   | P   | S   | C   | F   | S   | K   | A   | S   | A   | V   | Y   | N   |
| <i>C. frenata</i>   | V   | V   | N   | N   | R   | G   | Q   | P   | F   | D   | L   | R   | M   | A   | T   | I   | P   | S   | C   | F   | S   | K   | A   | S   | A   | V   | Y   | N   |
| <i>O. niloticus</i> | V   | V   | N   | N   | R   | G   | Q   | S   | F   | D   | L   | R   | L   | A   | T   | I   | P   | S   | C   | F   | S   | K   | A   | S   | A   | V   | Y   | N   |
| BovRH               | I   | F   | T   | H   | Q   | G   | S   | D   | F   | G   | P   | I   | F   | M   | T   | I   | P   | A   | F   | F   | A   | K   | T   | S   | A   | V   | Y   | N   |
|                     | 275 | 276 | 277 | 278 | 279 | 280 | 281 | 282 | 283 | 284 | 285 | 286 | 287 | 288 | 289 | 290 | 291 | 292 | 293 | 294 | 295 | 296 | 297 | 298 | 299 | 300 | 301 | 302 |

|                     |     |     |     |     |     |     |     |     |     |     |     |     |     |     |     |     |     |     |     |     |     |     |     |     |     |     |     |     |
|---------------------|-----|-----|-----|-----|-----|-----|-----|-----|-----|-----|-----|-----|-----|-----|-----|-----|-----|-----|-----|-----|-----|-----|-----|-----|-----|-----|-----|-----|
|                     | 309 | 310 | 311 | 312 | 313 | 314 | 315 | 316 | 317 | 318 | 319 | 320 | 321 | 322 | 323 | 324 | 325 | 326 | 327 | 328 | 329 | 330 | 331 | 332 | 333 | 334 |     |     |
| <i>S. discus</i>    | P   | V   | I   | Y   | V   | V   | F   | N   | K   | Q   | F   | R   | T   | C   | M   | L   | A   | M   | L   | G   | M   | G   | G   | G   | E   | E   |     |     |
| <i>P. scalare</i>   | P   | V   | I   | Y   | V   | V   | F   | N   | K   | Q   | F   | R   | T   | C   | M   | L   | A   | M   | M   | G   | M   | G   | G   | G   | E   | E   |     |     |
| <i>A. ocellatus</i> | P   | V   | I   | Y   | V   | V   | F   | N   | K   | Q   | F   | R   | T   | C   | M   | L   | A   | M   | L   | G   | M   | G   | G   | G   | E   | E   |     |     |
| <i>C. frenata</i>   | P   | V   | I   | Y   | V   | V   | F   | N   | K   | Q   | F   | R   | T   | C   | M   | L   | G   | M   | L   | G   | M   | G   | G   | G   | E   | E   |     |     |
| <i>O. niloticus</i> | P   | V   | I   | Y   | V   | V   | F   | N   | K   | Q   | F   | R   | T   | C   | M   | L   | A   | M   | M   | G   | M   | G   | G   | G   | E   | E   |     |     |
| BovRH               | P   | V   | I   | Y   | I   | M   | M   | N   | K   | Q   | F   | R   | N   | C   | M   | V   | T   | T   | L   | C   | C   | G   | K   | N   | P   | L   | G   | D   |
|                     | 303 | 304 | 305 | 306 | 307 | 308 | 309 | 310 | 311 | 312 | 313 | 314 | 315 | 316 | 317 | 318 | 319 | 320 | 321 | 322 | 323 | 324 | 325 | 331 | 332 | 333 | 334 | 335 |

|                     |     |     |     |     |     |     |     |     |     |     |     |     |     |     |     |     |     |
|---------------------|-----|-----|-----|-----|-----|-----|-----|-----|-----|-----|-----|-----|-----|-----|-----|-----|-----|
|                     | 335 | 336 | 337 | 338 | 339 | 340 | 341 | 342 | 343 | 344 | 345 | 346 | 347 | 348 | 349 | 350 | 351 |
| <i>S. discus</i>    | E   | S   | S   | T   | T   | S   | S   | V   | T   | E   | V   | S   | K   | V   | G   | P   | A   |
| <i>P. scalare</i>   | E   | S   | S   | T   | T   | S   | S   | V   | T   | E   | V   | S   | K   | V   | G   | P   | A   |
| <i>A. ocellatus</i> | E   | S   | S   | T   | T   | Q   | S   | V   | T   | E   | V   | S   | K   | V   | G   | P   | A   |
| <i>C. frenata</i>   | E   | S   | S   | T   | T   | Q   | S   | V   | T   | E   | V   | S   | K   | V   | G   | P   | A   |
| <i>O. niloticus</i> | E   | S   | S   | T   | T   | Q   | S   | V   | T   | E   | V   | S   | K   | V   | G   | P   | A   |
| BovRH               | S   | T   | T   | V   | S   | K   | T   | E   | T   | S   | Q   | V   | A   | P   | A   |     |     |
|                     | 336 | 337 | 338 | 339 | 340 | 341 | 342 | 343 | 344 | 345 | 346 | 347 | 348 | 349 | 350 |     |     |

|                       |   |   |   |   |   |   |   |   |   |    |    |    |    |    |    |    |    |    |    |    |    |    |    |    |    |    |    |    |
|-----------------------|---|---|---|---|---|---|---|---|---|----|----|----|----|----|----|----|----|----|----|----|----|----|----|----|----|----|----|----|
|                       | 1 | 2 | 3 | 4 | 5 | 6 | 7 | 8 | 9 | 10 | 11 | 12 | 13 | 14 | 15 | 16 | 17 | 18 | 19 | 20 | 21 | 22 | 23 | 24 | 25 | 26 | 27 | 28 |
| <i>S. discus</i>      | M | G | W | E | G | G | I | E | P | N  | G  | T  | E  | G  | K  | N  | F  | Y  | I  | P  | M  | S  | N  | R  | T  | G  | I  | V  |
| <i>A. ocellatus</i>   | M | G | W | E | G | G | I | E | P | N  | G  | T  | E  | G  | K  | N  | F  | Y  | I  | P  | M  | S  | N  | R  | T  | G  | I  | V  |
| <i>P. scalare</i>     | M | G | W | E | G | G | I | E | P | N  | G  | T  | E  | G  | K  | N  | F  | Y  | I  | P  | M  | S  | N  | R  | T  | G  | I  | V  |
| <i>C. frenata</i>     | M | G | W | E | G | G | I | E | P | N  | G  | T  | E  | G  | K  | N  | F  | Y  | I  | P  | M  | S  | N  | R  | T  | G  | I  | V  |
| <i>O. niloticus</i> α | M | V | W | D | G | G | I | E | P | N  | G  | T  | E  | G  | K  | N  | F  | Y  | I  | P  | M  | S  | N  | R  | T  | G  | I  | V  |
| <i>O. niloticus</i> β | M | A | W | E | G | G | I | E | P | N  | G  | T  | E  | G  | K  | N  | F  | Y  | I  | P  | M  | S  | N  | R  | T  | G  | I  | V  |
| BovRH                 | M | A | W | E | G | G | I | E | M | N  | G  | T  | E  | G  | P  | N  | F  | Y  | V  | P  | F  | S  | N  | K  | T  | G  | V  | V  |
|                       |   |   |   |   |   |   |   |   | 1 | 2  | 3  | 4  | 5  | 6  | 7  | 8  | 9  | 10 | 11 | 12 | 13 | 14 | 15 | 16 | 17 | 18 | 19 | 20 |

|                       |    |    |    |    |    |    |    |    |    |    |    |    |    |    |    |    |    |    |    |    |    |    |    |    |    |    |    |    |
|-----------------------|----|----|----|----|----|----|----|----|----|----|----|----|----|----|----|----|----|----|----|----|----|----|----|----|----|----|----|----|
|                       | 29 | 30 | 31 | 32 | 33 | 34 | 35 | 36 | 37 | 38 | 39 | 40 | 41 | 42 | 43 | 44 | 45 | 46 | 47 | 48 | 49 | 50 | 51 | 52 | 53 | 54 | 55 | 56 |
| <i>S. discus</i>      | R  | S  | P  | F  | E  | Y  | P  | Q  | Y  | Y  | L  | A  | D  | P  | I  | F  | F  | K  | L  | L  | A  | F  | Y  | M  | F  | F  | L  | I  |
| <i>A. ocellatus</i>   | R  | S  | P  | F  | E  | Y  | P  | Q  | Y  | Y  | L  | A  | D  | P  | I  | F  | F  | K  | L  | L  | A  | F  | Y  | M  | F  | F  | L  | I  |
| <i>P. scalare</i>     | R  | S  | P  | F  | E  | Y  | P  | Q  | F  | Y  | L  | A  | D  | P  | I  | F  | F  | K  | L  | L  | A  | F  | Y  | M  | F  | F  | L  | I  |
| <i>C. frenata</i>     | R  | S  | P  | F  | E  | Y  | P  | Q  | Y  | Y  | L  | V  | D  | P  | I  | F  | F  | K  | F  | L  | A  | F  | Y  | M  | F  | F  | L  | I  |
| <i>O. niloticus</i> α | R  | N  | P  | F  | E  | Y  | P  | Q  | Y  | Y  | M  | V  | D  | P  | I  | T  | Y  | K  | I  | L  | A  | F  | Y  | M  | F  | F  | L  | I  |
| <i>O. niloticus</i> β | R  | N  | P  | F  | E  | Y  | S  | Q  | Y  | Y  | L  | A  | D  | P  | I  | F  | F  | K  | L  | L  | A  | F  | Y  | M  | F  | F  | L  | I  |
| BovRH                 | R  | S  | P  | F  | E  | A  | P  | Q  | Y  | Y  | L  | A  | E  | P  | W  | Q  | F  | S  | M  | L  | A  | A  | Y  | M  | F  | L  | L  | I  |
|                       | 21 | 22 | 23 | 24 | 25 | 26 | 27 | 28 | 29 | 30 | 31 | 32 | 33 | 34 | 35 | 36 | 37 | 38 | 39 | 40 | 41 | 42 | 43 | 44 | 45 | 46 | 47 | 48 |

|                       |    |    |    |    |    |    |    |    |    |    |    |    |    |    |    |    |    |    |    |    |    |    |    |    |    |    |    |    |
|-----------------------|----|----|----|----|----|----|----|----|----|----|----|----|----|----|----|----|----|----|----|----|----|----|----|----|----|----|----|----|
|                       | 57 | 58 | 59 | 60 | 61 | 62 | 63 | 64 | 65 | 66 | 67 | 68 | 69 | 70 | 71 | 72 | 73 | 74 | 75 | 76 | 77 | 78 | 79 | 80 | 81 | 82 | 83 | 84 |
| <i>S. discus</i>      | C  | T  | G  | T  | P  | I  | N  | G  | L  | T  | L  | F  | V  | T  | A  | Q  | N  | K  | K  | L  | R  | Q  | P  | L  | N  | Y  | I  | L  |
| <i>A. ocellatus</i>   | C  | T  | G  | T  | P  | I  | N  | G  | L  | T  | L  | F  | V  | T  | A  | Q  | N  | K  | K  | L  | R  | Q  | P  | L  | N  | Y  | I  | L  |
| <i>P. scalare</i>     | C  | T  | G  | T  | P  | I  | N  | G  | L  | T  | L  | F  | V  | T  | A  | Q  | N  | K  | K  | L  | R  | Q  | P  | L  | N  | Y  | I  | L  |
| <i>C. frenata</i>     | C  | T  | G  | T  | P  | I  | N  | A  | L  | T  | L  | F  | V  | T  | A  | Q  | N  | K  | K  | L  | R  | Q  | P  | L  | N  | Y  | I  | L  |
| <i>O. niloticus</i> α | C  | T  | G  | T  | P  | I  | N  | G  | L  | T  | L  | F  | V  | T  | A  | Q  | N  | K  | K  | L  | R  | Q  | P  | L  | N  | Y  | I  | L  |
| <i>O. niloticus</i> β | C  | T  | G  | T  | P  | I  | N  | G  | L  | T  | L  | F  | V  | T  | A  | Q  | N  | K  | K  | L  | R  | Q  | P  | L  | N  | Y  | I  | L  |
| BovRH                 | M  | L  | G  | F  | P  | I  | N  | F  | L  | T  | L  | Y  | V  | T  | V  | Q  | H  | K  | K  | L  | R  | T  | P  | L  | N  | Y  | I  | L  |
|                       | 49 | 50 | 51 | 52 | 53 | 54 | 55 | 56 | 57 | 58 | 59 | 60 | 61 | 62 | 63 | 64 | 65 | 66 | 67 | 68 | 69 | 70 | 71 | 72 | 73 | 74 | 75 | 76 |

|                     |    |    |    |    |    |    |    |    |    |    |    |    |    |    |    |     |     |     |     |     |     |     |     |     |     |     |     |     |
|---------------------|----|----|----|----|----|----|----|----|----|----|----|----|----|----|----|-----|-----|-----|-----|-----|-----|-----|-----|-----|-----|-----|-----|-----|
|                     | 85 | 86 | 87 | 88 | 89 | 90 | 91 | 92 | 93 | 94 | 95 | 96 | 97 | 98 | 99 | 100 | 101 | 102 | 103 | 104 | 105 | 106 | 107 | 108 | 109 | 110 | 111 | 112 |
| <i>S. discus</i>    | V  | N  | L  | A  | V  | A  | G  | L  | I  | M  | C  | C  | F  | G  | F  | T   | I   | T   | I   | T   | S   | A   | F   | N   | G   | Y   | F   | I   |
| <i>A. ocellatus</i> | V  | N  | L  | A  | V  | A  | G  | L  | I  | M  | C  | C  | F  | G  | F  | T   | I   | T   | I   | T   | S   | A   | F   | N   | G   | Y   | F   | I   |
| <i>P. scalare</i>   | V  | N  | L  | A  | V  | A  | G  | L  | I  | M  | C  | C  | F  | G  | F  | T   | I   | T   | I   | T   | S   | A   | F   | N   | G   | Y   | F   | I   |
| <i>C. frenata</i>   | V  | N  | L  | A  | V  | A  | G  | L  | I  | M  | C  | C  | F  | G  | F  | T   | I   | T   | I   | T   | S   | A   | F   | N   | G   | Y   | F   | I   |

|                       |    |    |    |    |    |    |    |    |    |    |    |    |    |    |    |    |    |    |    |    |    |    |    |     |     |     |     |     |   |
|-----------------------|----|----|----|----|----|----|----|----|----|----|----|----|----|----|----|----|----|----|----|----|----|----|----|-----|-----|-----|-----|-----|---|
| <i>O. niloticus</i> α | V  | N  | L  | A  | V  | A  | G  | L  | I  | M  | C  | C  | F  | G  | F  | T  | I  | T  | I  | T  | S  | A  | V  | N   | G   | Y   | F   | I   |   |
| <i>O. niloticus</i> β | V  | N  | L  | A  | V  | A  | G  | L  | I  | M  | C  | C  | F  | G  | F  | T  | I  | T  | I  | T  | S  | A  | I  | N   | G   | Y   | F   | V   |   |
| BovRH                 | L  | N  | L  | A  | V  | A  | D  | L  | F  | M  | V  | F  | G  | G  | F  | T  | T  | T  | L  | Y  | T  | S  | L  | L   | H   | G   | Y   | F   | V |
|                       | 77 | 78 | 79 | 80 | 81 | 82 | 83 | 84 | 85 | 86 | 87 | 88 | 89 | 90 | 91 | 92 | 93 | 94 | 95 | 96 | 97 | 98 | 99 | 100 | 101 | 102 | 103 | 104 |   |

Δ

|                       |     |     |     |     |     |     |     |     |     |     |     |     |     |     |     |     |     |     |     |     |     |     |     |     |     |     |     |     |
|-----------------------|-----|-----|-----|-----|-----|-----|-----|-----|-----|-----|-----|-----|-----|-----|-----|-----|-----|-----|-----|-----|-----|-----|-----|-----|-----|-----|-----|-----|
| <i>S. discus</i>      | L   | G   | A   | T   | F   | C   | A   | I   | E   | G   | F   | M   | A   | T   | L   | G   | G   | E   | V   | A   | L   | W   | S   | L   | V   | V   | L   | A   |
| <i>A. ocellatus</i>   | L   | G   | A   | T   | F   | C   | A   | I   | E   | G   | F   | M   | A   | T   | L   | G   | G   | E   | V   | A   | L   | W   | S   | L   | V   | V   | L   | A   |
| <i>P. scalare</i>     | L   | G   | A   | T   | F   | C   | A   | I   | E   | G   | F   | M   | A   | T   | L   | G   | G   | E   | V   | A   | L   | W   | S   | L   | V   | V   | L   | A   |
| <i>C. frenata</i>     | L   | G   | A   | T   | F   | C   | A   | I   | E   | G   | F   | M   | A   | T   | L   | G   | G   | E   | V   | A   | L   | W   | S   | L   | V   | V   | L   | A   |
| <i>O. niloticus</i> α | L   | G   | P   | T   | F   | C   | A   | I   | E   | G   | F   | M   | A   | T   | L   | G   | G   | E   | V   | A   | L   | W   | S   | L   | V   | V   | L   | A   |
| <i>O. niloticus</i> β | L   | G   | T   | T   | F   | C   | A   | I   | E   | G   | F   | M   | A   | T   | L   | G   | G   | E   | V   | A   | L   | W   | S   | L   | V   | V   | L   | A   |
| BovRH                 | F   | G   | P   | T   | G   | C   | N   | L   | E   | G   | F   | F   | A   | T   | L   | G   | G   | E   | I   | A   | L   | W   | S   | L   | V   | V   | L   | A   |
|                       | 113 | 114 | 115 | 116 | 117 | 118 | 119 | 120 | 121 | 122 | 123 | 124 | 125 | 126 | 127 | 128 | 129 | 130 | 131 | 132 | 133 | 134 | 135 | 136 | 137 | 138 | 139 | 140 |

Δ

Δ

Δ

|                       |     |     |     |     |     |     |     |     |     |     |     |     |     |     |     |     |     |     |     |     |     |     |     |     |     |     |     |     |
|-----------------------|-----|-----|-----|-----|-----|-----|-----|-----|-----|-----|-----|-----|-----|-----|-----|-----|-----|-----|-----|-----|-----|-----|-----|-----|-----|-----|-----|-----|
| <i>S. discus</i>      | I   | E   | R   | Y   | I   | V   | V   | C   | K   | P   | M   | G   | S   | F   | K   | F   | S   | G   | T   | H   | A   | G   | A   | G   | V   | L   | F   | T   |
| <i>A. ocellatus</i>   | I   | E   | R   | Y   | I   | V   | V   | C   | K   | P   | M   | G   | S   | F   | K   | F   | S   | G   | T   | H   | A   | G   | A   | G   | V   | L   | F   | T   |
| <i>P. scalare</i>     | V   | E   | R   | Y   | I   | V   | V   | C   | K   | P   | M   | G   | S   | F   | K   | F   | S   | G   | T   | H   | A   | G   | A   | G   | V   | L   | F   | T   |
| <i>C. frenata</i>     | V   | E   | R   | Y   | I   | V   | V   | C   | K   | P   | M   | G   | S   | F   | K   | F   | S   | G   | T   | H   | A   | G   | A   | G   | V   | L   | F   | T   |
| <i>O. niloticus</i> α | V   | E   | R   | Y   | I   | V   | V   | C   | K   | P   | M   | G   | S   | F   | K   | F   | T   | G   | A   | H   | A   | G   | A   | G   | V   | F   | F   | T   |
| <i>O. niloticus</i> β | V   | E   | R   | Y   | I   | V   | V   | C   | K   | P   | M   | G   | S   | F   | K   | F   | T   | G   | A   | H   | A   | G   | A   | G   | V   | L   | F   | T   |
| BovRH                 | I   | E   | R   | Y   | V   | V   | V   | C   | K   | P   | M   | S   | N   | F   | R   | F   | G   | E   | N   | H   | A   | I   | M   | G   | V   | A   | F   | T   |
|                       | 141 | 142 | 143 | 144 | 145 | 146 | 147 | 148 | 149 | 150 | 151 | 152 | 153 | 154 | 155 | 156 | 157 | 158 | 159 | 160 | 161 | 162 | 163 | 164 | 165 | 166 | 167 | 168 |

\*

Δ

Δ

|                       |     |     |     |     |     |     |     |     |     |     |     |     |     |     |     |     |     |     |     |     |     |     |     |     |     |     |     |     |
|-----------------------|-----|-----|-----|-----|-----|-----|-----|-----|-----|-----|-----|-----|-----|-----|-----|-----|-----|-----|-----|-----|-----|-----|-----|-----|-----|-----|-----|-----|
| <i>S. discus</i>      | W   | I   | M   | A   | M   | A   | C   | A   | A   | P   | P   | L   | F   | G   | W   | S   | R   | Y   | I   | P   | E   | G   | M   | Q   | C   | S   | C   | G   |
| <i>A. ocellatus</i>   | W   | I   | M   | A   | M   | A   | C   | A   | A   | P   | P   | L   | F   | G   | W   | S   | R   | Y   | I   | P   | E   | G   | M   | Q   | C   | S   | C   | G   |
| <i>P. scalare</i>     | W   | I   | M   | A   | M   | A   | C   | A   | A   | P   | P   | L   | F   | G   | W   | S   | R   | Y   | L   | P   | E   | G   | M   | Q   | C   | S   | C   | G   |
| <i>C. frenata</i>     | W   | I   | M   | A   | M   | A   | C   | A   | A   | P   | P   | L   | V   | G   | W   | S   | R   | Y   | L   | P   | E   | G   | M   | Q   | C   | S   | C   | G   |
| <i>O. niloticus</i> α | W   | V   | M   | A   | M   | A   | C   | A   | A   | P   | P   | L   | F   | G   | W   | S   | R   | Y   | I   | P   | E   | G   | M   | Q   | C   | S   | C   | G   |
| <i>O. niloticus</i> β | W   | I   | M   | A   | M   | A   | C   | A   | A   | P   | P   | L   | F   | G   | W   | S   | R   | Y   | I   | P   | E   | G   | M   | Q   | C   | S   | C   | G   |
| BovRH                 | W   | V   | M   | A   | L   | A   | C   | A   | A   | P   | P   | L   | V   | G   | W   | S   | R   | Y   | I   | P   | E   | G   | M   | Q   | C   | S   | C   | G   |
|                       | 161 | 162 | 163 | 164 | 165 | 166 | 167 | 168 | 169 | 170 | 171 | 172 | 173 | 174 | 175 | 176 | 177 | 178 | 179 | 180 | 181 | 182 | 183 | 184 | 185 | 186 | 187 | 188 |

Δ

Δ

|                       |     |     |     |     |     |     |     |     |     |     |     |     |     |     |     |     |     |     |     |     |     |     |     |     |     |     |     |     |
|-----------------------|-----|-----|-----|-----|-----|-----|-----|-----|-----|-----|-----|-----|-----|-----|-----|-----|-----|-----|-----|-----|-----|-----|-----|-----|-----|-----|-----|-----|
| <i>S. discus</i>      | P   | D   | Y   | Y   | T   | L   | A   | P   | G   | F   | N   | N   | E   | S   | Y   | V   | I   | Y   | M   | F   | V   | V   | H   | F   | F   | V   | P   | V   |
| <i>A. ocellatus</i>   | P   | D   | Y   | Y   | T   | L   | A   | P   | G   | F   | N   | N   | E   | S   | Y   | V   | I   | Y   | M   | F   | V   | V   | H   | F   | F   | V   | P   | V   |
| <i>P. scalare</i>     | P   | D   | Y   | Y   | T   | L   | A   | P   | G   | F   | N   | N   | E   | S   | Y   | V   | I   | Y   | M   | F   | V   | V   | H   | F   | F   | V   | P   | V   |
| <i>C. frenata</i>     | P   | D   | Y   | Y   | T   | L   | A   | P   | G   | F   | N   | N   | E   | S   | Y   | V   | I   | Y   | M   | F   | V   | V   | H   | F   | F   | V   | P   | V   |
| <i>O. niloticus</i> α | P   | D   | Y   | Y   | T   | L   | A   | P   | G   | F   | N   | N   | E   | S   | Y   | V   | I   | Y   | M   | F   | V   | V   | H   | F   | F   | V   | P   | V   |
| <i>O. niloticus</i> β | P   | D   | Y   | Y   | T   | L   | A   | P   | G   | F   | N   | N   | E   | S   | Y   | V   | I   | Y   | M   | F   | V   | V   | H   | F   | F   | V   | P   | V   |
| BovRH                 | I   | D   | Y   | Y   | T   | P   | H   | E   | T   | N   | N   | E   | S   | F   | V   | I   | Y   | M   | F   | V   | V   | H   | F   | I   | I   | P   | L   |     |
|                       | 189 | 190 | 191 | 192 | 193 | 194 | 195 | 196 | 197 | 198 | 199 | 200 | 201 | 202 | 203 | 204 | 205 | 206 | 207 | 208 | 209 | 210 | 211 | 212 | 213 | 214 | 215 | 216 |

Δ

|                       |     |     |     |     |     |     |     |     |     |     |     |     |     |     |     |     |     |     |     |     |     |     |     |     |     |     |     |     |
|-----------------------|-----|-----|-----|-----|-----|-----|-----|-----|-----|-----|-----|-----|-----|-----|-----|-----|-----|-----|-----|-----|-----|-----|-----|-----|-----|-----|-----|-----|
| <i>S. discus</i>      | F   | I   | I   | F   | F   | T   | Y   | G   | S   | L   | V   | M   | T   | V   | K   | A   | A   | A   | A   | Q   | Q   | Q   | D   | S   | A   | S   | T   | Q   |
| <i>A. ocellatus</i>   | F   | I   | I   | F   | F   | T   | Y   | G   | S   | L   | V   | M   | T   | V   | K   | A   | A   | A   | A   | Q   | Q   | Q   | D   | S   | A   | S   | T   | Q   |
| <i>P. scalare</i>     | F   | I   | I   | F   | F   | T   | Y   | G   | S   | L   | V   | M   | T   | V   | K   | A   | A   | A   | A   | Q   | Q   | Q   | D   | S   | A   | S   | T   | Q   |
| <i>C. frenata</i>     | F   | I   | I   | F   | F   | T   | Y   | G   | S   | L   | V   | M   | T   | V   | K   | A   | A   | A   | A   | Q   | Q   | Q   | D   | S   | A   | S   | T   | Q   |
| <i>O. niloticus</i> α | F   | I   | I   | F   | F   | T   | Y   | G   | S   | L   | V   | M   | T   | V   | K   | A   | A   | A   | A   | Q   | Q   | Q   | D   | S   | A   | S   | T   | Q   |
| <i>O. niloticus</i> β | F   | I   | I   | F   | F   | T   | Y   | G   | S   | L   | V   | M   | T   | V   | X   | A   | A   | A   | A   | Q   | Q   | Q   | D   | S   | A   | S   | T   | Q   |
| BovRH                 | I   | V   | I   | F   | F   | C   | Y   | G   | Q   | L   | V   | F   | T   | V   | K   | E   | A   | A   | A   | Q   | Q   | Q   | E   | S   | A   | T   | T   | Q   |
|                       | 217 | 218 | 219 | 220 | 221 | 222 | 223 | 224 | 225 | 226 | 227 | 228 | 229 | 230 | 231 | 232 | 233 | 234 | 235 | 236 | 237 | 238 | 239 | 240 | 241 | 242 | 243 | 244 |

|                       |     |     |     |     |     |     |     |     |     |     |     |     |     |     |     |     |     |     |     |     |     |     |     |     |     |     |     |     |
|-----------------------|-----|-----|-----|-----|-----|-----|-----|-----|-----|-----|-----|-----|-----|-----|-----|-----|-----|-----|-----|-----|-----|-----|-----|-----|-----|-----|-----|-----|
| <i>S. discus</i>      | K   | A   | E   | K   | E   | V   | T   | R   | M   | C   | I   | L   | M   | V   | L   | G   | F   | L   | V   | A   | W   | T   | P   | Y   | A   | S   | F   | A   |
| <i>A. ocellatus</i>   | K   | A   | E   | K   | E   | V   | T   | R   | M   | C   | I   | L   | M   | V   | L   | G   | F   | M   | V   | A   | W   | T   | P   | Y   | A   | T   | F   | A   |
| <i>P. scalare</i>     | K   | A   | E   | K   | E   | V   | T   | R   | M   | C   | I   | L   | M   | V   | L   | G   | F   | L   | V   | A   | W   | T   | P   | Y   | A   | S   | F   | A   |
| <i>C. frenata</i>     | K   | A   | E   | R   | E   | V   | T   | R   | M   | C   | I   | L   | M   | V   | L   | G   | F   | L   | I   | A   | W   | T   | P   | Y   | A   | T   | F   | S   |
| <i>O. niloticus</i> α | K   | A   | E   | K   | E   | V   | T   | R   | M   | C   | V   | L   | M   | V   | M   | G   | F   | L   | V   | A   | W   | T   | P   | Y   | A   | S   | F   | A   |
| <i>O. niloticus</i> β | K   | A   | E   | K   | E   | V   | T   | R   | M   | C   | V   | L   | M   | V   | M   | G   | F   | L   | I   | A   | W   | T   | P   | Y   | A   | S   | F   | A   |
| BovRH                 | K   | A   | E   | K   | E   | V   | T   | R   | M   | V   | I   | I   | M   | V   | I   | A   | F   | L   | I   | C   | W   | L   | P   | Y   | A   | G   | V   | A   |
|                       | 245 | 246 | 247 | 248 | 249 | 250 | 251 | 252 | 253 | 254 | 255 | 256 | 257 | 258 | 259 | 260 | 261 | 262 | 263 | 264 | 265 | 266 | 267 | 268 | 269 | 270 | 271 | 272 |

Δ

Δ

Δ

|                       |     |     |     |     |     |     |     |     |     |     |     |     |     |     |     |     |     |     |     |     |     |     |     |     |     |     |     |     |
|-----------------------|-----|-----|-----|-----|-----|-----|-----|-----|-----|-----|-----|-----|-----|-----|-----|-----|-----|-----|-----|-----|-----|-----|-----|-----|-----|-----|-----|-----|
| <i>S. discus</i>      | G   | W   | I   | F   | L   | N   | K   | G   | A   | S   | F   | S   | A   | L   | T   | A   | A   | L   | P   | A   | F   | F   | A   | K   | S   | S   | A   | L   |
| <i>A. ocellatus</i>   | G   | W   | I   | F   | L   | N   | K   | G   | A   | S   | F   | S   | A   | L   | T   | A   | A   | L   | P   | A   | F   | F   | A   | K   | S   | S   | S   | L   |
| <i>P. scalare</i>     | G   | W   | I   | F   | L   | N   | K   | G   | A   | S   | F   | S   | A   | L   | T   | A   | A   | I   | P   | A   | F   | F   | A   | K   | S   | S   | A   | L   |
| <i>C. frenata</i>     | A   | W   | I   | F   | M   | N   | K   | G   | A   | Y   | F   | S   | A   | L   | T   | A   | A   | I   | P   | A   | F   | F   | A   | K   | S   | S   | A   | L   |
| <i>O. niloticus</i> α | G   | W   | I   | F   | L   | N   | K   | G   | A   | A   | F   | S   | A   | L   | T   | A   | A   | L   | P   | A   | F   | F   | A   | K   | S   | S   | A   | L   |
| <i>O. niloticus</i> β | G   | W   | I   | F   | L   | N   | K   | G   | A   | A   | F   | S   | A   | L   | T   | A   | A   | I   | P   | A   | F   | F   | A   | K   | S   | S   | A   | L   |
| BovRH                 | F   | Y   | I   | F   | T   | H   | Q   | G   | S   | D   | F   | G   | P   | I   | F   | M   | T   | I   | P   | A   | F   | F   | A   | K   | T   | S   | A   | V   |
|                       | 273 | 274 | 275 | 276 | 277 | 278 | 279 | 280 | 281 | 282 | 283 | 284 | 285 | 286 | 287 | 288 | 289 | 290 | 291 | 292 | 293 | 294 | 295 | 296 | 297 | 298 | 299 | 300 |



125 126 127 128 129 130 131 132 133 134 135 136 137 138 139 140 141 142 143 144 145 146 147 148 149 150 151 152

|                     |     |     |     |     |     |     |     |     |     |     |     |     |     |     |     |     |     |     |     |     |     |     |     |     |     |     |     |   |
|---------------------|-----|-----|-----|-----|-----|-----|-----|-----|-----|-----|-----|-----|-----|-----|-----|-----|-----|-----|-----|-----|-----|-----|-----|-----|-----|-----|-----|---|
| 166                 | 167 | 168 | 169 | 170 | 171 | 172 | 173 | 174 | 175 | 176 | 177 | 178 | 179 | 180 | 181 | 182 | 183 | 184 | 185 | 186 | 187 | 188 | 189 | 190 | 191 | 192 | 193 |   |
| <i>S. discus</i>    | A   | T   | A   | G   | I   | V   | F   | A   | W   | A   | W   | A   | A   | F   | W   | C   | A   | P   | P   | I   | F   | G   | W   | S   | R   | Y   | W   | P |
| <i>P. scalare</i>   | A   | T   | A   | G   | I   | V   | F   | S   | W   | V   | W   | S   | A   | G   | W   | C   | A   | P   | P   | I   | F   | G   | W   | S   | R   | Y   | W   | P |
| <i>A. ocellatus</i> | A   | T   | A   | G   | I   | V   | F   | S   | W   | V   | W   | S   | A   | G   | W   | C   | A   | P   | P   | V   | F   | G   | W   | S   | R   | Y   | W   | P |
| <i>C. frenata</i>   | A   | T   | A   | G   | I   | V   | F   | S   | W   | V   | W   | S   | A   | F   | W   | C   | A   | P   | P   | I   | F   | G   | W   | S   | R   | Y   | W   | P |
| <i>O. niloticus</i> | A   | T   | G   | G   | I   | V   | F   | S   | W   | V   | W   | S   | A   | F   | W   | C   | A   | P   | P   | I   | F   | G   | W   | S   | R   | F   | W   | P |
| BovRH               | A   | I   | M   | G   | V   | A   | F   | T   | W   | V   | M   | A   | L   | A   | C   | A   | A   | P   | P   | L   | V   | G   | W   | S   | R   | Y   | I   | P |

153 154 155 156 157 158 159 160 161 162 163 164 165 166 167 168 169 170 171 172 173 174 175 176 177 178 179 180

\*  
\*\*  
-7  
Δ

|                     |     |     |     |     |     |     |     |     |     |     |     |     |     |     |     |     |     |     |     |     |     |     |     |     |     |     |     |   |
|---------------------|-----|-----|-----|-----|-----|-----|-----|-----|-----|-----|-----|-----|-----|-----|-----|-----|-----|-----|-----|-----|-----|-----|-----|-----|-----|-----|-----|---|
| 194                 | 195 | 196 | 197 | 198 | 199 | 200 | 201 | 202 | 203 | 204 | 205 | 206 | 207 | 208 | 209 | 210 | 211 | 212 | 213 | 214 | 215 | 216 | 217 | 218 | 219 | 220 | 221 |   |
| <i>S. discus</i>    | H   | G   | L   | K   | T   | S   | C   | G   | P   | D   | V   | F   | S   | G   | S   | E   | D   | P   | G   | V   | Q   | S   | Y   | M   | I   | V   | L   | M |
| <i>P. scalare</i>   | H   | G   | L   | K   | T   | S   | C   | G   | P   | D   | V   | F   | S   | G   | S   | E   | D   | P   | G   | V   | L   | S   | Y   | M   | I   | V   | L   | M |
| <i>A. ocellatus</i> | H   | G   | L   | K   | T   | S   | C   | G   | P   | D   | V   | F   | S   | G   | S   | E   | D   | P   | G   | V   | L   | S   | Y   | M   | I   | V   | L   | M |
| <i>C. frenata</i>   | H   | G   | L   | K   | T   | S   | C   | G   | P   | D   | V   | F   | S   | G   | S   | E   | D   | P   | G   | V   | Q   | S   | Y   | M   | I   | V   | L   | M |
| <i>O. niloticus</i> | H   | G   | L   | K   | T   | S   | C   | G   | P   | D   | V   | F   | S   | G   | S   | E   | D   | P   | G   | V   | Q   | S   | Y   | M   | I   | V   | L   | M |
| BovRH               | E   | G   | M   | Q   | C   | S   | C   | G   | I   | D   | Y   | Y   | T   | P   | H   | E   | E   | T   | N   | N   | E   | S   | F   | V   | I   | Y   | M   | F |

181 182 183 184 185 186 187 188 189 190 191 192 193 194 195 196 197 198 199 200 201 202 203 204 205 206 207 208

\*  
Δ

|                     |     |     |     |     |     |     |     |     |     |     |     |     |     |     |     |     |     |     |     |     |     |     |     |     |     |     |     |   |
|---------------------|-----|-----|-----|-----|-----|-----|-----|-----|-----|-----|-----|-----|-----|-----|-----|-----|-----|-----|-----|-----|-----|-----|-----|-----|-----|-----|-----|---|
| 222                 | 223 | 224 | 225 | 226 | 227 | 228 | 229 | 230 | 231 | 232 | 233 | 234 | 235 | 236 | 237 | 238 | 239 | 240 | 241 | 242 | 243 | 244 | 245 | 246 | 247 | 248 | 249 |   |
| <i>S. discus</i>    | I   | T   | C   | C   | F   | I   | P   | L   | G   | I   | I   | I   | L   | C   | Y   | L   | A   | V   | W   | M   | A   | I   | R   | S   | V   | A   | M   | Q |
| <i>P. scalare</i>   | I   | T   | C   | C   | F   | I   | P   | L   | G   | I   | I   | L   | C   | Y   | L   | A   | V   | W   | L   | A   | I   | R   | S   | V   | A   | M   | Q   |   |
| <i>A. ocellatus</i> | I   | T   | C   | C   | F   | I   | P   | L   | G   | V   | I   | I   | L   | C   | Y   | L   | A   | V   | W   | M   | A   | I   | R   | S   | V   | A   | M   | Q |
| <i>C. frenata</i>   | I   | T   | C   | C   | F   | I   | P   | L   | A   | V   | I   | I   | L   | C   | Y   | L   | A   | V   | W   | M   | A   | I   | R   | S   | V   | A   | M   | Q |
| <i>O. niloticus</i> | I   | T   | C   | C   | I   | I   | P   | L   | G   | I   | I   | I   | L   | C   | Y   | L   | A   | V   | W   | L   | A   | I   | R   | A   | V   | A   | M   | Q |
| BovRH               | V   | V   | H   | F   | I   | I   | P   | L   | I   | V   | I   | F   | C   | Y   | G   | Q   | L   | V   | F   | T   | V   | K   | E   | A   | A   | A   | Q   |   |

209 210 211 212 213 214 215 216 217 218 219 220 221 222 223 224 225 226 227 228 229 230 231 232 233 234 235 236

Δ Δ Δ

|                     |     |     |     |     |     |     |     |     |     |     |     |     |     |     |     |     |     |     |     |     |     |     |     |     |     |     |     |   |
|---------------------|-----|-----|-----|-----|-----|-----|-----|-----|-----|-----|-----|-----|-----|-----|-----|-----|-----|-----|-----|-----|-----|-----|-----|-----|-----|-----|-----|---|
| 250                 | 251 | 252 | 253 | 254 | 255 | 256 | 257 | 258 | 259 | 260 | 261 | 262 | 263 | 264 | 265 | 266 | 267 | 268 | 269 | 270 | 271 | 272 | 273 | 274 | 275 | 276 | 277 |   |
| <i>S. discus</i>    | Q   | K   | E   | S   | E   | S   | T   | Q   | K   | A   | E   | K   | E   | V   | S   | R   | M   | I   | V   | V   | M   | I   | L   | A   | Y   | C   | F   | C |
| <i>P. scalare</i>   | Q   | K   | E   | S   | E   | S   | T   | Q   | K   | A   | E   | K   | E   | V   | S   | R   | M   | I   | V   | V   | M   | I   | V   | A   | Y   | C   | F   | C |
| <i>A. ocellatus</i> | Q   | K   | E   | S   | E   | S   | T   | Q   | K   | A   | E   | K   | E   | V   | S   | R   | M   | I   | V   | V   | M   | I   | L   | A   | Y   | C   | F   | C |
| <i>C. frenata</i>   | Q   | K   | E   | S   | E   | S   | T   | Q   | K   | A   | E   | K   | E   | V   | S   | R   | M   | I   | V   | I   | M   | I   | L   | A   | Y   | C   | F   | C |
| <i>O. niloticus</i> | Q   | K   | E   | S   | E   | S   | T   | Q   | K   | A   | E   | K   | E   | V   | S   | R   | M   | V   | V   | V   | M   | I   | V   | A   | Y   | C   | V   | C |
| BovRH               | Q   | Q   | E   | S   | A   | T   | T   | Q   | K   | A   | E   | K   | E   | V   | T   | R   | M   | V   | I   | I   | M   | V   | I   | A   | F   | L   | I   | C |

237 238 239 240 241 242 243 244 245 246 247 248 249 250 251 252 253 254 255 256 257 258 259 260 261 262 263 264

Δ Δ

|                     |     |     |     |     |     |     |     |     |     |     |     |     |     |     |     |     |     |     |     |     |     |     |     |     |     |     |     |   |
|---------------------|-----|-----|-----|-----|-----|-----|-----|-----|-----|-----|-----|-----|-----|-----|-----|-----|-----|-----|-----|-----|-----|-----|-----|-----|-----|-----|-----|---|
| 278                 | 279 | 280 | 281 | 282 | 283 | 284 | 285 | 286 | 287 | 288 | 289 | 290 | 291 | 292 | 293 | 294 | 295 | 296 | 297 | 298 | 299 | 300 | 301 | 302 | 303 | 304 | 305 |   |
| <i>S. discus</i>    | W   | G   | P   | Y   | T   | F   | F   | A   | C   | F   | A   | A   | A   | N   | P   | G   | Y   | A   | F   | H   | P   | L   | A   | A   | A   | M   | P   | A |
| <i>P. scalare</i>   | W   | G   | P   | Y   | T   | F   | F   | A   | C   | F   | A   | A   | A   | N   | P   | G   | Y   | A   | F   | H   | P   | L   | A   | A   | A   | M   | P   | A |
| <i>A. ocellatus</i> | W   | G   | P   | Y   | T   | F   | F   | A   | C   | F   | A   | A   | A   | N   | P   | G   | Y   | A   | F   | H   | P   | L   | A   | A   | A   | M   | P   | A |
| <i>C. frenata</i>   | W   | G   | P   | Y   | T   | F   | F   | A   | C   | F   | A   | A   | A   | N   | P   | G   | Y   | A   | F   | H   | P   | L   | A   | A   | A   | M   | P   | A |
| <i>O. niloticus</i> | W   | G   | P   | Y   | T   | F   | F   | A   | C   | F   | A   | A   | A   | N   | P   | G   | Y   | A   | F   | H   | P   | L   | A   | A   | A   | M   | P   | A |
| BovRH               | W   | L   | P   | Y   | A   | G   | V   | A   | F   | Y   | I   | F   | T   | H   | Q   | G   | S   | D   | F   | G   | P   | I   | F   | M   | T   | I   | P   | A |

265 266 267 268 269 270 271 272 273 274 275 276 277 278 279 280 281 282 283 284 285 286 287 288 289 290 291 292

|                     |     |     |     |     |     |     |     |     |     |     |     |     |     |     |     |     |     |     |     |     |     |     |     |     |     |     |     |   |
|---------------------|-----|-----|-----|-----|-----|-----|-----|-----|-----|-----|-----|-----|-----|-----|-----|-----|-----|-----|-----|-----|-----|-----|-----|-----|-----|-----|-----|---|
| 306                 | 307 | 308 | 309 | 310 | 311 | 312 | 313 | 314 | 315 | 316 | 317 | 318 | 319 | 320 | 321 | 322 | 323 | 324 | 325 | 326 | 327 | 328 | 329 | 330 | 331 | 332 | 333 |   |
| <i>S. discus</i>    | Y   | F   | A   | K   | S   | A   | T   | I   | Y   | N   | P   | I   | I   | Y   | V   | F   | M   | N   | R   | Q   | F   | R   | S   | C   | I   | M   | Q   | L |
| <i>P. scalare</i>   | Y   | F   | A   | K   | S   | A   | T   | I   | Y   | N   | P   | I   | I   | Y   | V   | F   | M   | N   | R   | Q   | F   | R   | S   | C   | I   | M   | Q   | L |
| <i>A. ocellatus</i> | Y   | F   | A   | K   | S   | A   | T   | I   | Y   | N   | P   | I   | I   | Y   | V   | F   | M   | N   | R   | Q   | F   | R   | S   | C   | I   | M   | Q   | L |
| <i>C. frenata</i>   | Y   | F   | A   | K   | S   | A   | T   | I   | Y   | N   | P   | I   | I   | Y   | V   | F   | M   | N   | R   | Q   | F   | R   | S   | C   | I   | M   | Q   | L |
| <i>O. niloticus</i> | Y   | F   | A   | K   | S   | A   | T   | I   | Y   | N   | P   | I   | I   | Y   | V   | F   | M   | N   | R   | Q   | F   | R   | T   | C   | I   | M   | Q   | L |
| BovRH               | F   | F   | A   | K   | T   | S   | A   | V   | Y   | N   | P   | V   | I   | Y   | I   | M   | M   | N   | K   | Q   | F   | R   | N   | C   | M   | V   | T   | T |

293 294 295 296 297 298 299 300 301 302 303 304 305 306 307 308 309 310 311 312 313 314 315 316 317 318 319 320

|                     |     |     |     |     |     |     |     |     |     |     |     |     |     |     |     |     |     |     |     |     |     |     |     |   |  |  |
|---------------------|-----|-----|-----|-----|-----|-----|-----|-----|-----|-----|-----|-----|-----|-----|-----|-----|-----|-----|-----|-----|-----|-----|-----|---|--|--|
| 334                 | 335 | 336 | 337 | 338 | 339 | 340 | 341 | 342 | 343 | 344 | 345 | 346 | 347 | 348 | 349 | 350 | 351 | 352 | 353 | 354 | 355 | 356 | 357 |   |  |  |
| <i>S. discus</i>    | F   | G   | K   | Q   | V   | D   | D   | G   | S   | E   | V   | S   | T   | S   | K   | T   | E   | V   | S   | S   | V   | A   | P   | A |  |  |
| <i>P. scalare</i>   | F   | G   | K   | Q   | V   | D   | D   | G   | S   | E   | V   | S   | T   | S   | K   | T   | E   | V   | S   | S   | V   | A   | P   | A |  |  |
| <i>A. ocellatus</i> | F   | G   | K   | Q   | V   | D   | D   | G   | S   | E   | V   | S   | T   | S   | K   | T   | E   | V   | S   | S   | V   | A   | P   | A |  |  |
| <i>C. frenata</i>   | F   | G   | K   | Q   | V   | D   | D   | G   | S   | E   | V   | S   | T   | S   | K   | T   | E   | V   | S   | S   | V   | A   | P   | A |  |  |
| <i>O. niloticus</i> | F   | G   | K   | Q   | V   | D   | D   | G   | S   | E   | V   | S   | T   | S   | K   | T   | E   | V   | S   | S   | V   | A   | P   | A |  |  |
| BovRH               | L   | C   | C   | G   | K   | N   | P   | L   | G   | D   | S   | T   | T   | E   | T   | S   | Q   | V   | A   | P   | A   |     |     |   |  |  |

321 322 323 324 325 326 327 328 329 330 331 332 333 334 335 336 337 338 339 340 341 342 343 344 345

|                     |   |   |   |   |   |   |   |   |   |    |    |    |    |    |    |    |    |    |    |    |    |    |    |    |    |    |    |    |
|---------------------|---|---|---|---|---|---|---|---|---|----|----|----|----|----|----|----|----|----|----|----|----|----|----|----|----|----|----|----|
| <b>RH1</b>          | 1 | 2 | 3 | 4 | 5 | 6 | 7 | 8 | 9 | 10 | 11 | 12 | 13 | 14 | 15 | 16 | 17 | 18 | 19 | 20 | 21 | 22 | 23 | 24 | 25 | 26 | 27 | 28 |
| <i>S. discus</i>    | M | N | G | T | E | G | P | F | F | Y  | V  | P  | M  | V  | N  | T  | T  | G  | V  | V  | R  | S  | P  | Y  | E  | Y  | P  | Q  |
| <i>P. scalare</i>   | M | N | G | T | E | G | P | F | F | Y  | V  | P  | M  | V  | N  | T  | T  | G  | I  | V  | R  | S  | P  | Y  | E  | Y  | P  | Q  |
| <i>A. ocellatus</i> | M | N | G | T | E | G | P | F | F | Y  | V  | P  | M  | L  | N  | T  | T  | G  | I  | V  | R  | S  | P  | Y  | E  | Y  | P  | Q  |
| <i>C. frenata</i>   | M | N | G | T | E | G | P | F | F | Y  | V  | P  | M  | L  | N  | T  | T  | G  | I  | V  | R  | S  | P  | Y  | E  | Y  | P  | Q  |



|                     |   |   |   |   |   |   |   |   |   |    |    |    |    |    |    |    |    |    |    |    |    |    |    |    |    |    |    |    |
|---------------------|---|---|---|---|---|---|---|---|---|----|----|----|----|----|----|----|----|----|----|----|----|----|----|----|----|----|----|----|
| <i>O. niloticus</i> | M | N | G | T | E | G | P | F | F | Y  | V  | P  | M  | V  | N  | T  | T  | G  | I  | V  | R  | S  | P  | Y  | E  | Y  | P  | Q  |
| BovRH               | M | N | G | T | E | G | P | N | F | Y  | V  | P  | F  | S  | N  | K  | T  | G  | V  | V  | R  | S  | P  | F  | E  | A  | P  | Q  |
|                     | 1 | 2 | 3 | 4 | 5 | 6 | 7 | 8 | 9 | 10 | 11 | 12 | 13 | 14 | 15 | 16 | 17 | 18 | 19 | 20 | 21 | 22 | 23 | 24 | 25 | 26 | 27 | 28 |

|                       |    |    |    |    |    |    |    |    |    |    |    |    |    |    |    |    |    |    |    |    |    |    |    |    |    |    |    |    |
|-----------------------|----|----|----|----|----|----|----|----|----|----|----|----|----|----|----|----|----|----|----|----|----|----|----|----|----|----|----|----|
|                       | 29 | 30 | 31 | 32 | 33 | 34 | 35 | 36 | 37 | 38 | 39 | 40 | 41 | 42 | 43 | 44 | 45 | 46 | 47 | 48 | 49 | 50 | 51 | 52 | 53 | 54 | 55 | 56 |
| <i>S. discus</i>      | H  | Y  | L  | V  | T  | P  | A  | A  | Y  | A  | A  | L  | G  | A  | Y  | M  | F  | F  | L  | I  | I  | A  | G  | F  | P  | I  | N  | F  |
| <i>P. scalare</i>     | Y  | Y  | L  | V  | S  | P  | A  | A  | Y  | A  | A  | L  | G  | A  | Y  | M  | F  | F  | L  | I  | I  | A  | G  | F  | P  | I  | N  | F  |
| <i>A. s ocellatus</i> | Y  | Y  | L  | V  | N  | P  | A  | A  | Y  | A  | A  | L  | G  | A  | Y  | M  | F  | F  | L  | I  | I  | A  | G  | F  | P  | I  | N  | F  |
| <i>C. frenata</i>     | H  | Y  | L  | V  | N  | P  | A  | A  | Y  | A  | A  | L  | G  | A  | Y  | M  | F  | F  | L  | I  | I  | A  | G  | F  | P  | I  | N  | F  |
| <i>O. niloticus</i>   | H  | Y  | L  | V  | S  | P  | A  | A  | Y  | A  | A  | L  | G  | A  | Y  | M  | F  | F  | L  | I  | I  | A  | G  | F  | P  | I  | N  | F  |
| BovRH                 | Y  | Y  | L  | A  | E  | P  | W  | Q  | F  | S  | M  | L  | A  | A  | Y  | M  | F  | L  | L  | I  | M  | L  | G  | F  | P  | I  | N  | F  |
|                       | 29 | 30 | 31 | 32 | 33 | 34 | 35 | 36 | 37 | 38 | 39 | 40 | 41 | 42 | 43 | 44 | 45 | 46 | 47 | 48 | 49 | 50 | 51 | 52 | 53 | 54 | 55 | 56 |

Δ

|                       |    |    |    |    |    |    |    |    |    |    |    |    |    |    |    |    |    |    |    |    |    |    |    |    |    |    |    |    |
|-----------------------|----|----|----|----|----|----|----|----|----|----|----|----|----|----|----|----|----|----|----|----|----|----|----|----|----|----|----|----|
|                       | 57 | 58 | 59 | 60 | 61 | 62 | 63 | 64 | 65 | 66 | 67 | 68 | 69 | 70 | 71 | 72 | 73 | 74 | 75 | 76 | 77 | 78 | 79 | 80 | 81 | 82 | 83 | 84 |
| <i>S. discus</i>      | L  | T  | L  | Y  | V  | T  | I  | E  | H  | K  | K  | L  | R  | T  | P  | L  | N  | Y  | I  | L  | L  | N  | L  | A  | V  | A  | N  | L  |
| <i>P. scalare</i>     | L  | T  | L  | Y  | V  | T  | I  | E  | H  | K  | K  | L  | R  | T  | P  | L  | N  | Y  | V  | L  | L  | N  | L  | A  | V  | A  | N  | L  |
| <i>A. s ocellatus</i> | L  | T  | L  | Y  | V  | T  | I  | E  | H  | K  | K  | L  | R  | T  | P  | L  | N  | Y  | V  | L  | L  | N  | L  | A  | V  | A  | N  | L  |
| <i>C. frenata</i>     | L  | T  | L  | Y  | V  | T  | I  | E  | H  | K  | K  | L  | R  | T  | P  | L  | N  | Y  | I  | L  | L  | N  | L  | A  | V  | A  | N  | L  |
| <i>O. niloticus</i>   | L  | T  | L  | Y  | V  | T  | I  | E  | H  | K  | K  | L  | R  | T  | P  | L  | N  | Y  | I  | L  | L  | N  | L  | A  | V  | A  | N  | L  |
| BovRH                 | L  | T  | L  | Y  | V  | T  | V  | Q  | H  | K  | K  | L  | R  | T  | P  | L  | N  | Y  | I  | L  | L  | N  | L  | A  | V  | A  | N  | L  |
|                       | 57 | 58 | 59 | 60 | 61 | 62 | 63 | 64 | 65 | 66 | 67 | 68 | 69 | 70 | 71 | 72 | 73 | 74 | 75 | 76 | 77 | 78 | 79 | 80 | 81 | 82 | 83 | 84 |

Δ

|                       |    |    |    |    |    |    |    |    |    |    |    |    |    |    |    |     |     |     |     |     |     |     |     |     |     |     |     |     |
|-----------------------|----|----|----|----|----|----|----|----|----|----|----|----|----|----|----|-----|-----|-----|-----|-----|-----|-----|-----|-----|-----|-----|-----|-----|
|                       | 85 | 86 | 87 | 88 | 89 | 90 | 91 | 92 | 93 | 94 | 95 | 96 | 97 | 98 | 99 | 100 | 101 | 102 | 103 | 104 | 105 | 106 | 107 | 108 | 109 | 110 | 111 | 112 |
| <i>S. discus</i>      | F  | M  | V  | F  | G  | G  | F  | T  | T  | T  | M  | Y  | T  | S  | M  | H   | G   | Y   | F   | V   | L   | G   | R   | L   | G   | C   | N   | L   |
| <i>P. scalare</i>     | F  | M  | V  | F  | G  | G  | F  | T  | T  | T  | M  | Y  | T  | S  | M  | H   | G   | Y   | F   | V   | L   | G   | R   | L   | G   | C   | N   | L   |
| <i>A. s ocellatus</i> | F  | M  | V  | F  | G  | G  | F  | T  | T  | T  | M  | Y  | T  | S  | M  | H   | G   | Y   | F   | V   | L   | G   | R   | L   | G   | C   | N   | L   |
| <i>C. frenata</i>     | F  | M  | V  | F  | G  | G  | F  | T  | T  | T  | M  | Y  | T  | S  | M  | H   | G   | Y   | F   | V   | L   | G   | R   | L   | G   | C   | N   | L   |
| <i>O. niloticus</i>   | F  | M  | V  | F  | G  | G  | F  | T  | T  | T  | M  | Y  | T  | S  | M  | H   | G   | Y   | F   | V   | L   | G   | R   | L   | G   | C   | N   | L   |
| BovRH                 | F  | M  | V  | F  | G  | G  | F  | T  | T  | T  | L  | Y  | T  | S  | L  | H   | G   | Y   | F   | V   | F   | G   | P   | T   | G   | C   | N   | L   |
|                       | 85 | 86 | 87 | 88 | 89 | 90 | 91 | 92 | 93 | 94 | 95 | 96 | 97 | 98 | 99 | 100 | 101 | 102 | 103 | 104 | 105 | 106 | 107 | 108 | 109 | 110 | 111 | 112 |

\*\*

-6

|                       |     |     |     |     |     |     |     |     |     |     |     |     |     |     |     |     |     |     |     |     |     |     |     |     |     |     |     |     |
|-----------------------|-----|-----|-----|-----|-----|-----|-----|-----|-----|-----|-----|-----|-----|-----|-----|-----|-----|-----|-----|-----|-----|-----|-----|-----|-----|-----|-----|-----|
|                       | 113 | 114 | 115 | 116 | 117 | 118 | 119 | 120 | 121 | 122 | 123 | 124 | 125 | 126 | 127 | 128 | 129 | 130 | 131 | 132 | 133 | 134 | 135 | 136 | 137 | 138 | 139 | 140 |
| <i>S. discus</i>      | E   | G   | F   | F   | A   | T   | L   | G   | G   | E   | M   | S   | L   | W   | S   | L   | V   | A   | L   | A   | I   | E   | R   | W   | L   | V   | V   | C   |
| <i>P. scalare</i>     | E   | G   | F   | F   | A   | T   | L   | G   | G   | E   | M   | S   | L   | W   | S   | L   | V   | A   | L   | A   | I   | E   | R   | W   | L   | V   | V   | C   |
| <i>A. s ocellatus</i> | E   | G   | F   | F   | A   | T   | L   | G   | G   | E   | M   | S   | L   | W   | S   | L   | V   | A   | L   | A   | I   | E   | R   | W   | L   | V   | V   | C   |
| <i>C. frenata</i>     | E   | G   | F   | F   | A   | T   | L   | G   | G   | E   | M   | S   | L   | W   | S   | L   | V   | A   | L   | A   | I   | E   | R   | W   | L   | V   | V   | C   |
| <i>O. niloticus</i>   | E   | G   | F   | F   | A   | T   | L   | G   | G   | E   | I   | G   | L   | W   | S   | L   | V   | V   | L   | A   | V   | E   | R   | W   | L   | V   | V   | C   |
| BovRH                 | E   | G   | F   | F   | A   | T   | L   | G   | G   | E   | I   | A   | L   | W   | S   | L   | V   | V   | L   | A   | I   | E   | R   | Y   | V   | V   | V   | C   |
|                       | 113 | 114 | 115 | 116 | 117 | 118 | 119 | 120 | 121 | 122 | 123 | 124 | 125 | 126 | 127 | 128 | 129 | 130 | 131 | 132 | 133 | 134 | 135 | 136 | 137 | 138 | 139 | 140 |

\*

|                       |     |     |     |     |     |     |     |     |     |     |     |     |     |     |     |     |     |     |     |     |     |     |     |     |     |     |     |     |
|-----------------------|-----|-----|-----|-----|-----|-----|-----|-----|-----|-----|-----|-----|-----|-----|-----|-----|-----|-----|-----|-----|-----|-----|-----|-----|-----|-----|-----|-----|
|                       | 141 | 142 | 143 | 144 | 145 | 146 | 147 | 148 | 149 | 150 | 151 | 152 | 153 | 154 | 155 | 156 | 157 | 158 | 159 | 160 | 161 | 162 | 163 | 164 | 165 | 166 | 167 | 168 |
| <i>S. discus</i>      | K   | P   | I   | S   | N   | F   | R   | F   | G   | E   | S   | H   | A   | I   | V   | G   | L   | A   | F   | T   | W   | I   | M   | A   | L   | S   | C   | A   |
| <i>P. scalare</i>     | K   | P   | I   | S   | N   | F   | R   | F   | G   | E   | N   | H   | A   | I   | M   | G   | L   | A   | F   | T   | W   | I   | M   | A   | L   | S   | C   | A   |
| <i>A. s ocellatus</i> | K   | P   | I   | S   | N   | F   | R   | F   | G   | E   | N   | H   | A   | I   | M   | G   | L   | A   | F   | T   | W   | I   | M   | A   | L   | S   | C   | A   |
| <i>C. frenata</i>     | K   | P   | I   | S   | N   | F   | R   | F   | G   | E   | N   | H   | A   | I   | M   | G   | L   | A   | F   | T   | W   | I   | M   | A   | L   | S   | C   | A   |
| <i>O. niloticus</i>   | K   | P   | I   | S   | N   | F   | R   | F   | G   | E   | N   | H   | A   | I   | M   | G   | L   | A   | F   | T   | W   | L   | A   | A   | L   | S   | C   | A   |
| BovRH                 | K   | P   | M   | S   | N   | F   | R   | F   | G   | E   | N   | H   | A   | I   | M   | G   | V   | A   | F   | T   | W   | V   | M   | A   | L   | A   | C   | A   |
|                       | 141 | 142 | 143 | 144 | 145 | 146 | 147 | 148 | 149 | 150 | 151 | 152 | 153 | 154 | 155 | 156 | 157 | 158 | 159 | 160 | 161 | 162 | 163 | 164 | 165 | 166 | 167 | 168 |

Δ

Δ

|                       |     |     |     |     |     |     |     |     |     |     |     |     |     |     |     |     |     |     |     |     |     |     |     |     |     |     |     |     |
|-----------------------|-----|-----|-----|-----|-----|-----|-----|-----|-----|-----|-----|-----|-----|-----|-----|-----|-----|-----|-----|-----|-----|-----|-----|-----|-----|-----|-----|-----|
|                       | 169 | 170 | 171 | 172 | 173 | 174 | 175 | 176 | 177 | 178 | 179 | 180 | 181 | 182 | 183 | 184 | 185 | 186 | 187 | 188 | 189 | 190 | 191 | 192 | 193 | 194 | 195 | 196 |
| <i>S. discus</i>      | G   | P   | P   | V   | V   | G   | W   | S   | R   | Y   | I   | P   | E   | G   | M   | Q   | C   | S   | C   | G   | V   | D   | Y   | Y   | T   | R   | A   | E   |
| <i>P. scalare</i>     | G   | P   | P   | V   | V   | G   | W   | S   | R   | Y   | I   | P   | E   | G   | M   | Q   | C   | S   | C   | G   | V   | D   | Y   | Y   | T   | R   | A   | E   |
| <i>A. s ocellatus</i> | G   | P   | P   | V   | V   | G   | W   | S   | R   | Y   | I   | P   | E   | G   | M   | Q   | C   | S   | C   | G   | V   | D   | Y   | Y   | T   | R   | A   | E   |
| <i>C. frenata</i>     | G   | P   | P   | V   | I   | G   | W   | S   | R   | Y   | I   | P   | E   | G   | M   | Q   | C   | S   | C   | G   | V   | D   | Y   | Y   | T   | R   | A   | E   |
| <i>O. niloticus</i>   | G   | P   | P   | L   | V   | G   | W   | S   | R   | Y   | I   | P   | E   | G   | M   | Q   | C   | S   | C   | G   | V   | D   | Y   | Y   | T   | R   | A   | E   |
| BovRH                 | A   | P   | P   | L   | V   | G   | W   | S   | R   | Y   | I   | P   | E   | G   | M   | Q   | C   | S   | C   | G   | I   | D   | Y   | Y   | T   | P   | H   | E   |
|                       | 169 | 170 | 171 | 172 | 173 | 174 | 175 | 176 | 177 | 178 | 179 | 180 | 181 | 182 | 183 | 184 | 185 | 186 | 187 | 188 | 189 | 190 | 191 | 192 | 193 | 194 | 195 | 196 |

|                       |     |     |     |     |     |     |     |     |     |     |     |     |     |     |     |     |     |     |     |     |     |     |     |     |     |     |     |     |
|-----------------------|-----|-----|-----|-----|-----|-----|-----|-----|-----|-----|-----|-----|-----|-----|-----|-----|-----|-----|-----|-----|-----|-----|-----|-----|-----|-----|-----|-----|
|                       | 197 | 198 | 199 | 200 | 201 | 202 | 203 | 204 | 205 | 206 | 207 | 208 | 209 | 210 | 211 | 212 | 213 | 214 | 215 | 216 | 217 | 218 | 219 | 220 | 221 | 222 | 223 | 224 |
| <i>S. discus</i>      | G   | F   | N   | N   | E   | S   | F   | V   | I   | Y   | M   | F   | I   | C   | H   | F   | L   | I   | P   | L   | T   | V   | V   | F   | F   | C   | Y   | G   |
| <i>P. scalare</i>     | G   | F   | N   | N   | E   | S   | F   | V   | I   | Y   | M   | F   | I   | C   | H   | F   | L   | I   | P   | L   | A   | V   | V   | F   | F   | C   | Y   | G   |
| <i>A. s ocellatus</i> | G   | F   | N   | N   | E   | S   | F   | V   | I   | Y   | M   | F   | I   | C   | H   | F   | L   | I   | P   | L   | T   | V   | V   | F   | F   | C   | Y   | G   |
| <i>C. frenata</i>     | G   | F   | N   | N   | E   | S   | F   | V   | I   | Y   | M   | F   | I   | V   | H   | F   | L   | I   | P   | L   | T   | I   | V   | F   | F   | C   | Y   | G   |
| <i>O. niloticus</i>   | G   | F   | N   | N   | E   | S   | F   | V   | I   | Y   | M   | F   | I   | C   | H   | F   | L   | I   | P   | L   | T   | V   | V   | F   | F   | C   | Y   | G   |
| BovRH                 | E   | T   | N   | N   | E   | S   | F   | V   | I   | Y   | M   | F   | V   | V   | H   | F   | I   | I   | P   | L   | I   | V   | I   | F   | F   | C   | Y   | G   |
|                       | 197 | 198 | 199 | 200 | 201 | 202 | 203 | 204 | 205 | 206 | 207 | 208 | 209 | 210 | 211 | 212 | 213 | 214 | 215 | 216 | 217 | 218 | 219 | 220 | 221 | 222 | 223 | 224 |

Δ

Δ

Δ

|                       |   |   |   |   |   |   |   |   |   |   |   |   |   |   |   |   |   |   |   |   |   |   |   |   |   |   |   |
|-----------------------|---|---|---|---|---|---|---|---|---|---|---|---|---|---|---|---|---|---|---|---|---|---|---|---|---|---|---|
| <i>S. discus</i>      | R | L | L | C | A | V | K | E | A | A | A | Q | Q | E | S | E | T | T | Q | R | A | E | K | E | V | T | R |
| <i>P. scalare</i>     | R | L | L | C | A | V | K | E | A | A | A | Q | Q | E | S | E | T | T | Q | R | A | E | R | E | V | T | R |
| <i>A. s ocellatus</i> | R | L | L | C | A | V | K | E | A | A | A | Q | Q | E | S | E | T | T | Q | R | A | E | R | E | V | T | R |
| <i>C. frenata</i>     | R | L | L | C | A | V | K | E | A | A | A | Q | Q | E | S | E | T | T | Q | R | A | E | R | E | V | T | R |

|                      |     |     |     |     |     |     |     |     |     |     |     |     |     |     |     |     |     |     |     |     |     |     |     |     |     |     |     |     |   |
|----------------------|-----|-----|-----|-----|-----|-----|-----|-----|-----|-----|-----|-----|-----|-----|-----|-----|-----|-----|-----|-----|-----|-----|-----|-----|-----|-----|-----|-----|---|
| <i>O. niloticus</i>  | R   | L   | L   | C   | A   | V   | K   | E   | A   | A   | A   | A   | Q   | Q   | E   | S   | E   | T   | T   | Q   | R   | A   | E   | R   | E   | V   | T   | R   |   |
| BovRH                | Q   | L   | V   | F   | T   | V   | K   | E   | A   | A   | A   | Q   | Q   | Q   | E   | S   | A   | T   | T   | Q   | K   | A   | E   | K   | E   | V   | T   | R   |   |
|                      | 225 | 226 | 227 | 228 | 229 | 230 | 231 | 232 | 233 | 234 | 235 | 236 | 237 | 238 | 239 | 240 | 241 | 242 | 243 | 244 | 245 | 246 | 247 | 248 | 249 | 250 | 251 | 252 |   |
|                      | Δ   |     |     |     |     |     |     |     |     |     |     |     |     |     |     |     |     |     |     |     |     |     |     |     |     |     |     |     |   |
| <i>S. discus</i>     | M   | V   | V   | I   | M   | V   | I   | A   | F   | L   | I   | C   | W   | L   | P   | Y   | A   | G   | V   | A   | W   | W   | I   | F   | T   | H   | Q   | G   |   |
| <i>P. scalare</i>    | M   | V   | V   | I   | M   | V   | I   | A   | F   | L   | I   | C   | W   | L   | P   | Y   | A   | G   | V   | A   | W   | W   | I   | F   | T   | H   | Q   | G   |   |
| <i>A.s ocellatus</i> | M   | V   | V   | I   | M   | V   | I   | A   | F   | L   | I   | C   | W   | L   | P   | Y   | A   | G   | V   | A   | W   | W   | I   | F   | T   | H   | Q   | G   |   |
| <i>C. frenata</i>    | M   | V   | V   | I   | M   | V   | I   | A   | F   | L   | I   | C   | W   | L   | P   | Y   | A   | G   | V   | A   | W   | W   | I   | F   | T   | H   | Q   | G   |   |
| <i>O. niloticus</i>  | M   | V   | V   | I   | M   | V   | I   | S   | F   | L   | I   | C   | W   | L   | P   | Y   | A   | G   | V   | A   | W   | Y   | I   | F   | T   | H   | Q   | G   |   |
| BovRH                | M   | V   | I   | I   | M   | V   | I   | A   | F   | L   | I   | C   | W   | L   | P   | Y   | A   | G   | V   | A   | F   | Y   | I   | F   | T   | H   | Q   | G   |   |
|                      | 253 | 254 | 255 | 256 | 257 | 258 | 259 | 260 | 261 | 262 | 263 | 264 | 265 | 266 | 267 | 268 | 269 | 270 | 271 | 272 | 273 | 274 | 275 | 276 | 277 | 278 | 279 | 280 |   |
|                      | *   |     |     |     |     |     |     |     |     |     |     |     |     |     |     |     |     |     |     |     |     |     |     |     |     |     |     |     |   |
| <i>S. discus</i>     | A   | E   | F   | G   | P   | I   | L   | M   | T   | L   | P   | A   | F   | F   | A   | K   | S   | S   | A   | I   | Y   | N   | P   | L   | I   | Y   | I   | C   |   |
| <i>P. scalare</i>    | S   | E   | F   | G   | P   | V   | F   | M   | T   | L   | P   | A   | F   | F   | A   | K   | S   | S   | S   | I   | Y   | N   | P   | L   | I   | Y   | I   | C   |   |
| <i>A.s ocellatus</i> | A   | E   | F   | G   | P   | V   | L   | M   | T   | L   | P   | A   | F   | F   | A   | K   | S   | S   | S   | I   | Y   | N   | P   | L   | I   | Y   | I   | C   |   |
| <i>C. frenata</i>    | A   | E   | F   | G   | P   | I   | L   | M   | T   | L   | P   | A   | F   | F   | A   | K   | S   | S   | S   | A   | I   | Y   | N   | P   | L   | I   | Y   | I   | C |
| <i>O. niloticus</i>  | S   | E   | F   | G   | P   | V   | F   | M   | T   | L   | P   | A   | F   | F   | A   | K   | S   | S   | S   | I   | Y   | N   | P   | L   | I   | Y   | I   | C   |   |
| BovRH                | S   | D   | F   | G   | P   | I   | F   | M   | T   | I   | P   | A   | F   | F   | A   | K   | T   | S   | A   | V   | Y   | N   | P   | V   | I   | Y   | I   | M   |   |
|                      | 281 | 282 | 283 | 284 | 285 | 286 | 287 | 288 | 289 | 290 | 291 | 292 | 293 | 294 | 295 | 296 | 297 | 298 | 299 | 300 | 301 | 302 | 303 | 304 | 305 | 306 | 307 | 308 |   |
|                      | **  |     |     |     |     |     |     |     |     |     |     |     |     |     |     |     |     |     |     |     |     |     |     |     |     |     |     |     |   |
|                      | Δ   |     |     |     |     |     |     |     |     |     |     |     |     |     |     |     |     |     |     |     |     |     |     |     |     |     |     |     |   |
| <i>S. discus</i>     | M   | N   | K   | Q   | F   | R   | H   | C   | M   | I   | T   | T   | L   | C   | C   | G   | K   | N   | P   | F   | E   | E   | E   | E   | G   | A   | S   | T   |   |
| <i>P. scalare</i>    | M   | N   | K   | Q   | F   | R   | H   | C   | M   | I   | T   | T   | L   | C   | C   | G   | K   | N   | P   | F   | E   | E   | E   | E   | G   | A   | S   | T   |   |
| <i>A.s ocellatus</i> | M   | N   | K   | Q   | F   | R   | H   | C   | M   | I   | T   | T   | L   | C   | C   | G   | K   | N   | P   | F   | E   | E   | E   | E   | G   | A   | S   | T   |   |
| <i>C. frenata</i>    | M   | N   | K   | Q   | F   | R   | H   | C   | M   | I   | T   | T   | L   | C   | C   | G   | K   | N   | P   | F   | E   | E   | E   | E   | G   | A   | S   | T   |   |
| <i>O. niloticus</i>  | M   | N   | K   | Q   | F   | R   | H   | C   | M   | I   | T   | T   | L   | C   | C   | G   | K   | N   | P   | F   | E   | E   | E   | E   | G   | A   | S   | T   |   |
| BovRH                | M   | N   | K   | Q   | F   | R   | N   | C   | M   | V   | T   | T   | L   | C   | C   | G   | K   | N   | P   | L   | G   | D   | D   | E   | A   | S   | T   |     |   |
|                      | 309 | 310 | 311 | 312 | 313 | 314 | 315 | 316 | 317 | 318 | 319 | 320 | 321 | 322 | 323 | 324 | 325 | 326 | 327 | 328 | 329 | 330 | 331 | 332 | 333 | 334 | 335 | 336 |   |
| <i>S. discus</i>     | T   | A   | S   | K   | T   | E   | A   | S   | S   | V   | S   | S   | S   | S   | V   | S   | P   | A   |     |     |     |     |     |     |     |     |     |     |   |
| <i>P. scalare</i>    | T   | A   | S   | K   | T   | E   | A   | S   | S   | V   | S   | S   | S   | S   | V   | S   | P   | A   |     |     |     |     |     |     |     |     |     |     |   |
| <i>A.s ocellatus</i> | T   | A   | S   | K   | T   | E   | A   | S   | S   | V   | S   | S   | S   | S   | V   | S   | P   | A   |     |     |     |     |     |     |     |     |     |     |   |
| <i>C. frenata</i>    | T   | A   | S   | K   | T   | E   | A   | S   | S   | V   | S   | S   | S   | S   | V   | S   | P   | A   |     |     |     |     |     |     |     |     |     |     |   |
| <i>O. niloticus</i>  | T   | A   | S   | K   | T   | E   | A   | S   | S   | V   | S   | S   | S   | S   | V   | S   | P   | A   |     |     |     |     |     |     |     |     |     |     |   |
| BovRH                | T   | V   | S   | K   | T   | E   | T   | S   | Q   | V   | A   | P   | A   |     |     |     |     |     |     |     |     |     |     |     |     |     |     |     |   |
|                      | 337 | 338 | 339 | 340 | 341 | 342 | 343 | 344 | 345 | 346 | 347 | 348 |     |     |     |     |     |     |     |     |     |     |     |     |     |     |     |     |   |

- \* polarity change substitution
- \*\* substitution that creates a shift in λmax
- color letter aminoacid substitution
- box border known tuning sites
- Δ variable aa between neotropical cichlids

Light green areas denote transmembrane protein regions  
Color lines denote known spectral tuning sites  
Gray areas denote binding pocket sites,
